# Supplementary material
Source: PubMed Central journal article supplement (PMC3744134)
Supplement: NIHMS51197-supplement-1.pdf [file NIHMS51197-supplement-1.pdf]

## **SUPPLEMENTARY INFORMATION**

### **Hamartin confers neuroprotection against ischemia by inducing autophagy**

Michalis Papadakis, Gina Hadley, Maria Xilouri, Lisa C. Hoyte, Simon Nagel, M Mary  
McMenamin, Grigorios Tsaknakis, Suzanne M. Watt, Cynthia Wright Drakesmith, Ruoli  
Chen, Matthew J A Wood, Zonghang Zhao, Benedikt Kessler, Kostas Vekrellis, Alastair M.

Buchan

**Supplementary Figures 1-13**

**Supplementary Tables 1-9**

**Supplementary Results and Discussion**

**Supplementary References**

## Supplementary Figure 1

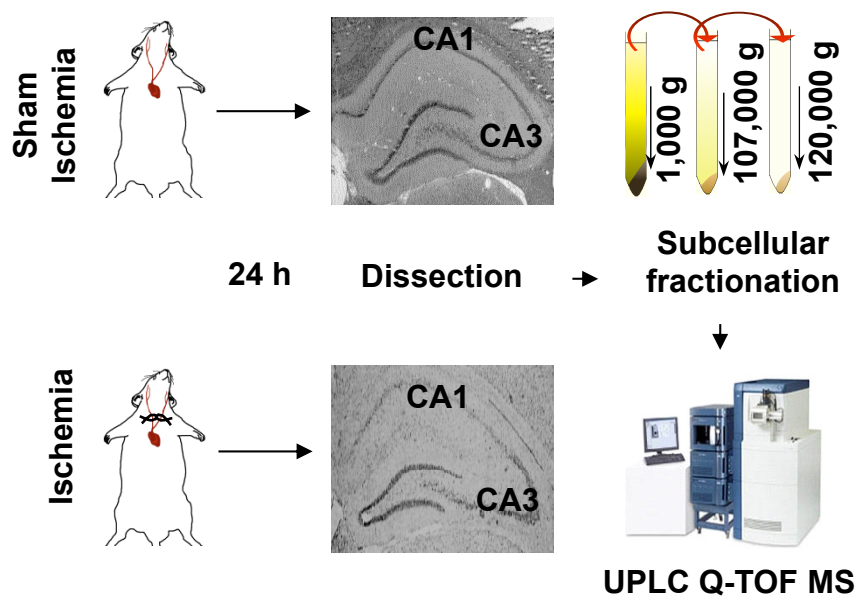

**Experimental design of proteomic experiments.** Rats were subjected to either sham ischemia or 10 min ischemia. Following 24 h of reperfusion, the CA1 and CA3 regions were microdissected and each region was subcellularly fractionated by differential centrifugation to generate a cytoplasmic and a membrane fraction. Each fraction was quantitatively analysed to define its proteome using UPLC-QTOF MS.

## Supplementary Figure 2

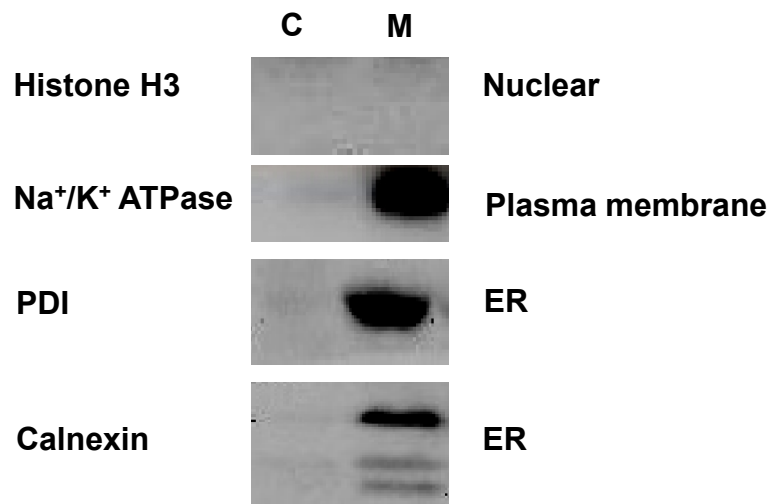

**Purity of subcellular fractions.** Microdissected hippocampal tissue was subjected to subcellular fractionation to derive a cytoplasmic (C) and a membrane (M) fraction. The purity of the fractions was assessed by immunoblotting using nuclear (Histone H3), plasma membrane (Na<sup>+</sup>/K<sup>+</sup> ATPase), and endoplasmic reticulum (ER; protein disulfide isomerase (PDI), Calnexin) markers. The figure shows representative immunoblots from n=3, demonstrating that neither the cytoplasmic nor the membrane fraction was contaminated with nuclear proteins. In addition, the immunoreactivity of the plasma membrane and organelle markers was limited to the membrane fraction.

### Supplementary Figure 3

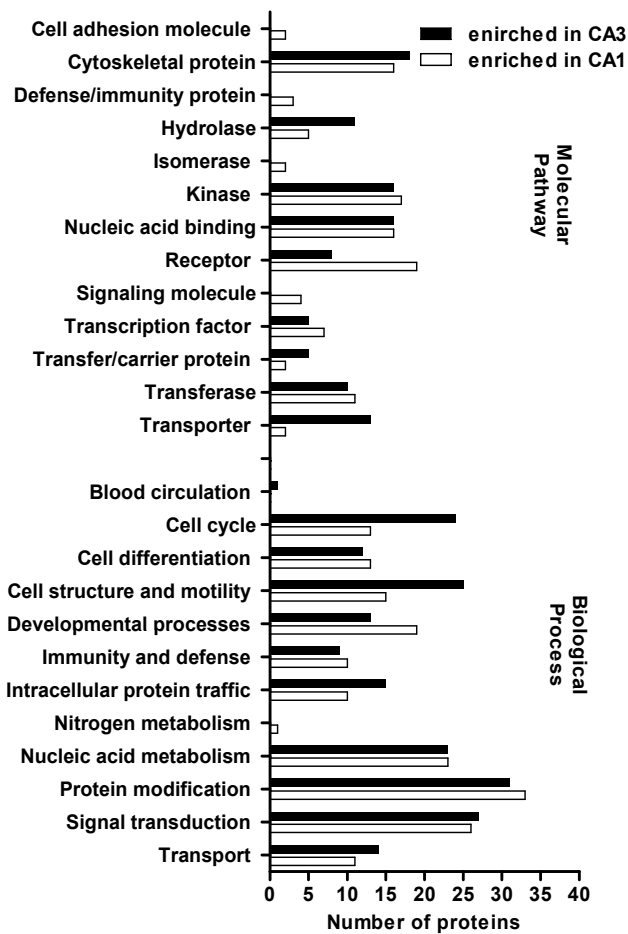

**Ontological analysis of enriched proteins in the CA1 and CA3 regions of sham ischemic animals.** Using the proteomic datasets, proteins that were overexpressed in the CA1 or the CA3 region of sham ischemic rats were ontologically analyzed using the panther classification system according to both the biological process and the molecular pathway they participate. The bar graph shows the number of protein that belong to each group for the CA3 (black-filled bars) or the CA1 (white-filled bars) region. The ten biological processes and ten molecular pathways containing most proteins and those that were selectively affected either in the CA1 or CA3 region are displayed.

## Supplementary Figure 4

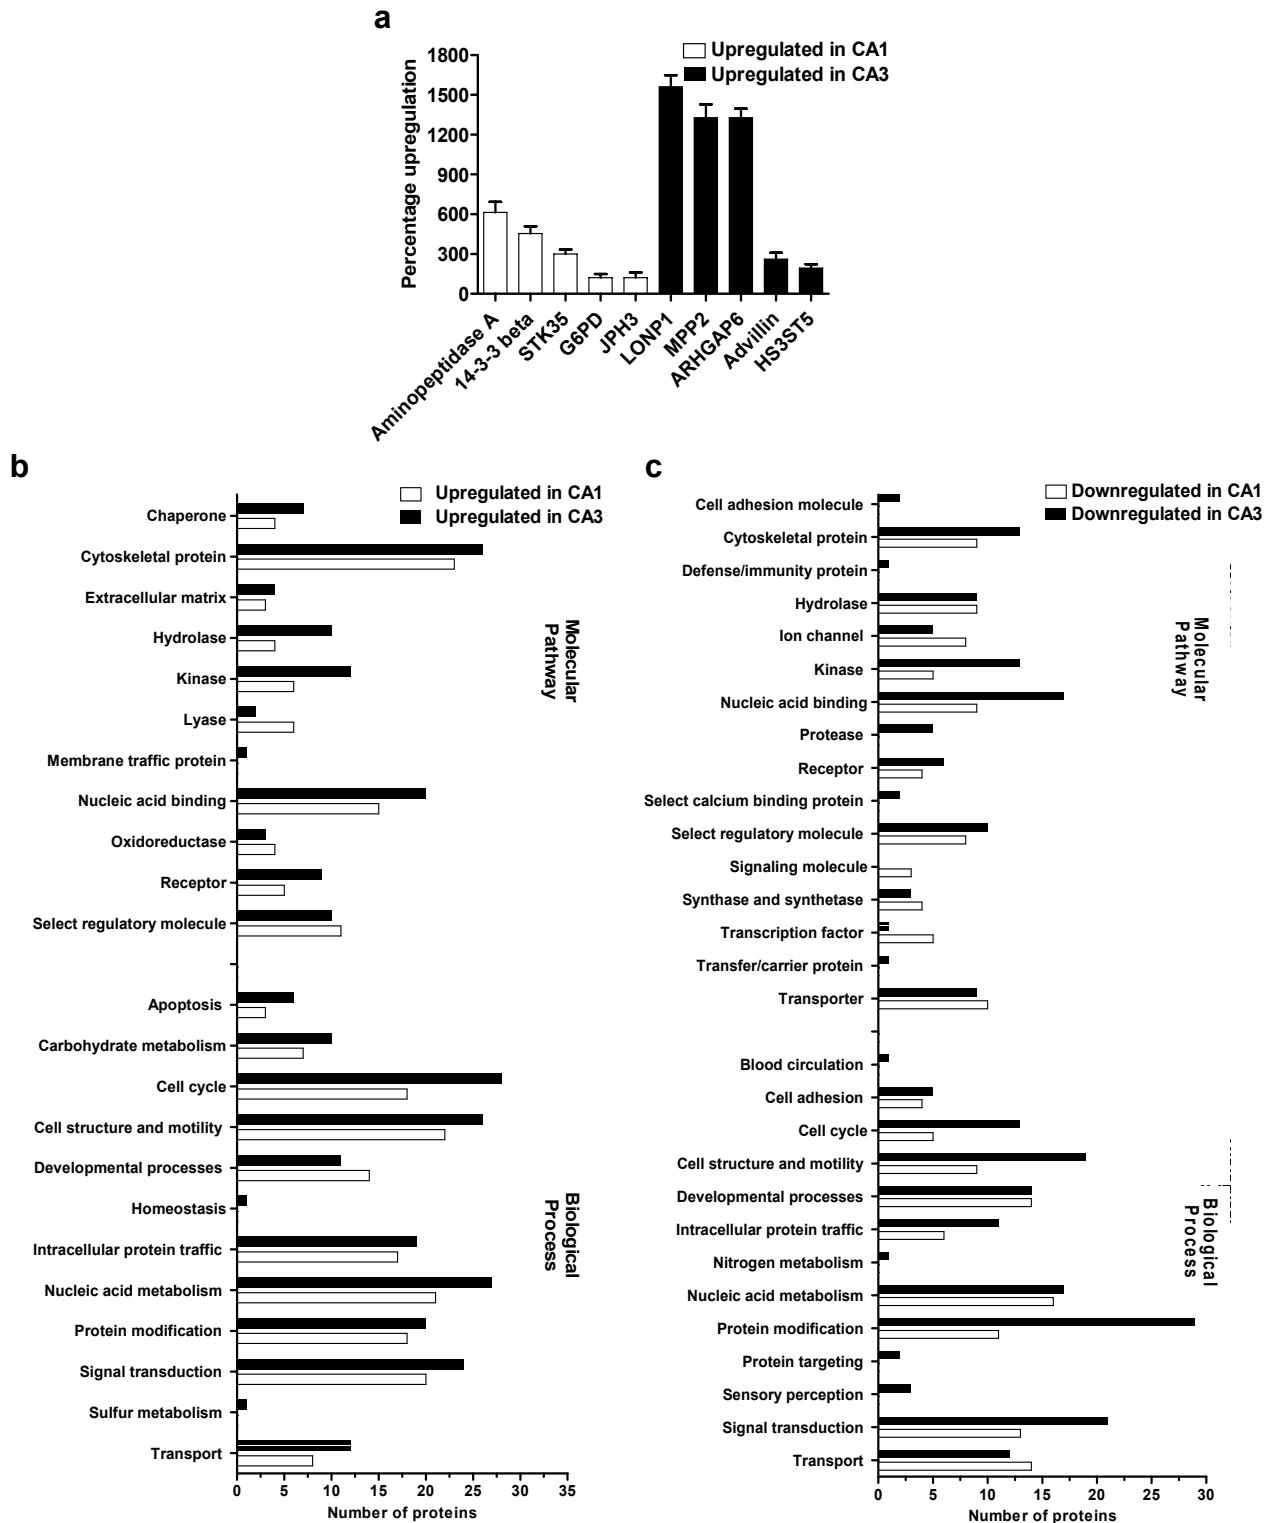

**Ontological analysis of proteins with altered expression within the CA1 or CA3 by ischemia and reperfusion.** (a) Bar graph shows the percentage increase of the five mostly upregulated proteins within the CA1 or CA3 regions, after ischemia and reperfusion, as determined by the proteomic analysis. (b,c) The proteins whose expression was increased (b) or decreased (c) by ischemia within the CA1 (white-filled columns) or the CA3 (black-filled columns) region were analyzed with the panther classification system, and were grouped according to both their biological process and their molecular pathway. Both bar graphs show the number of proteins belonging to each group. The ten biological processes and ten molecular pathways containing most proteins and those that were selectively affected either in the CA1 or CA3 region are displayed.

## Supplementary Figure 5

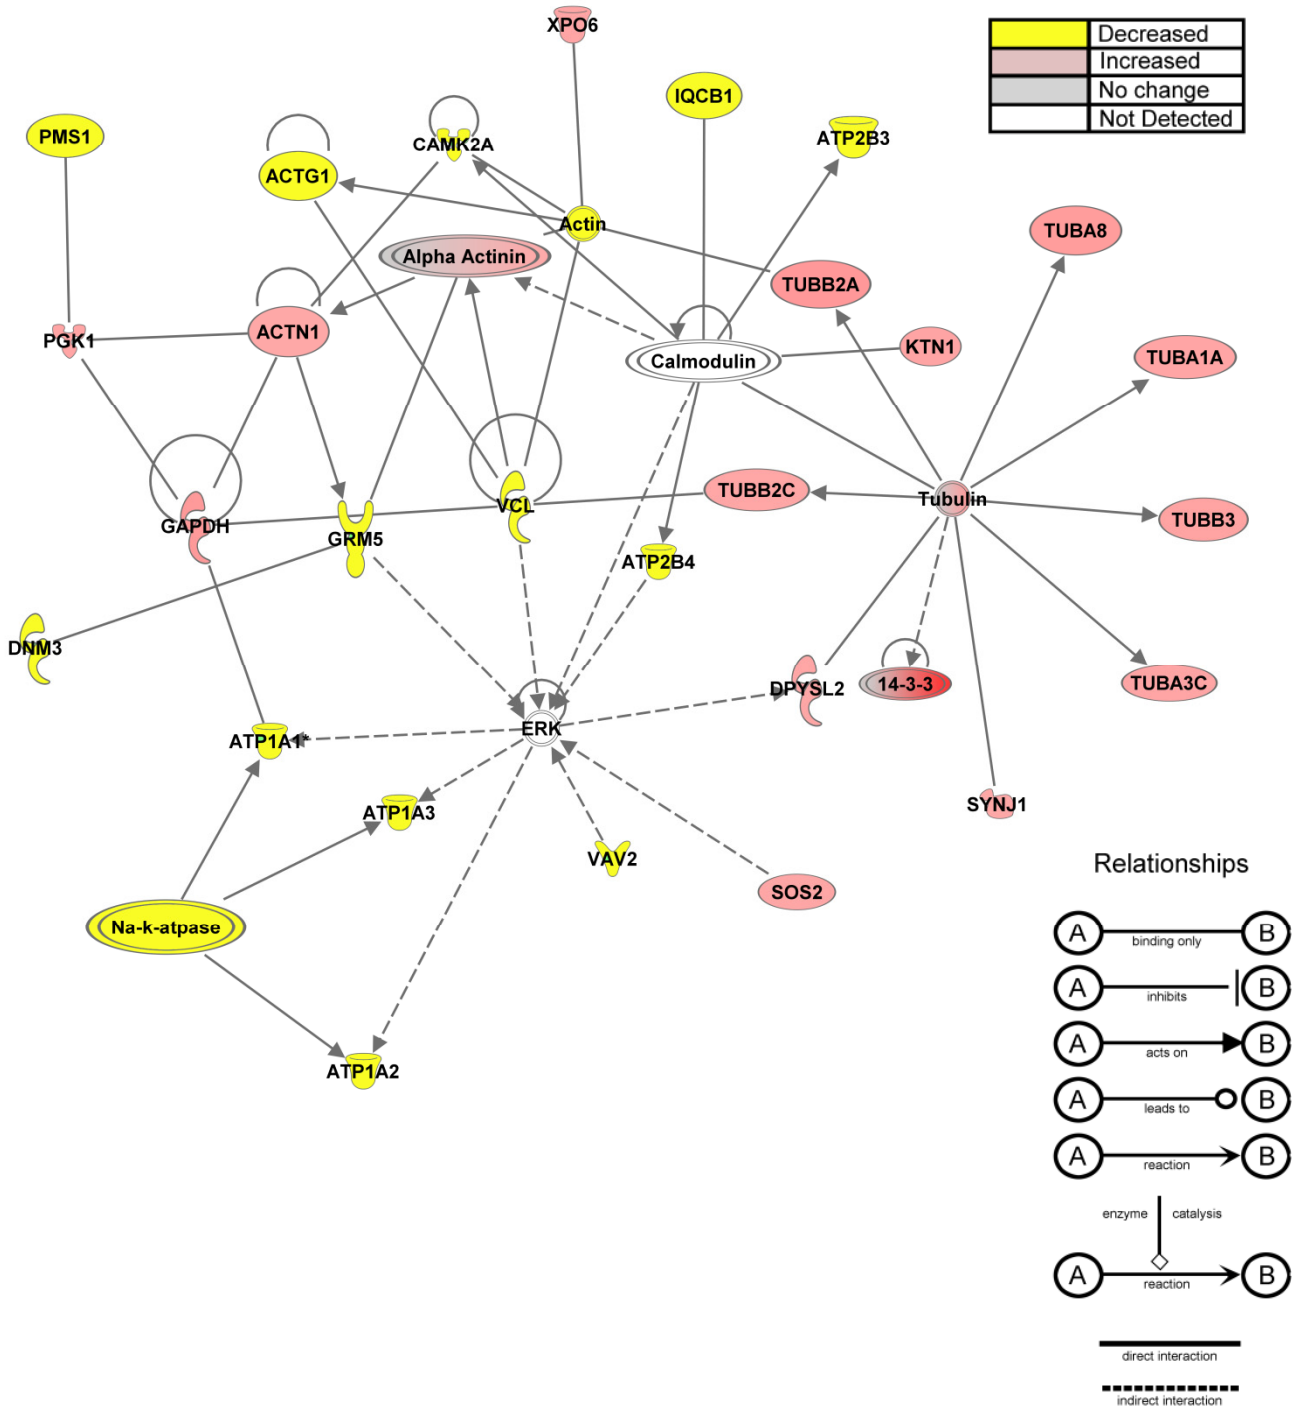

**Network of genes affected in the CA1 after ischemia.** Diagram of a protein network, which was significantly associated with the expression level changes taking place by ischemia in the CA1 region. Proteins in red and yellow were upregulated and downregulated, respectively, by ischemia. Proteins in grey were detected by the proteomic analysis, but their expression was unaffected. Proteins in white participate in the network, but were not detected by the proteomic experiments. Images were created using the IPA software. The relationships between the displayed proteins are indicated.

Supplementary Figure 6

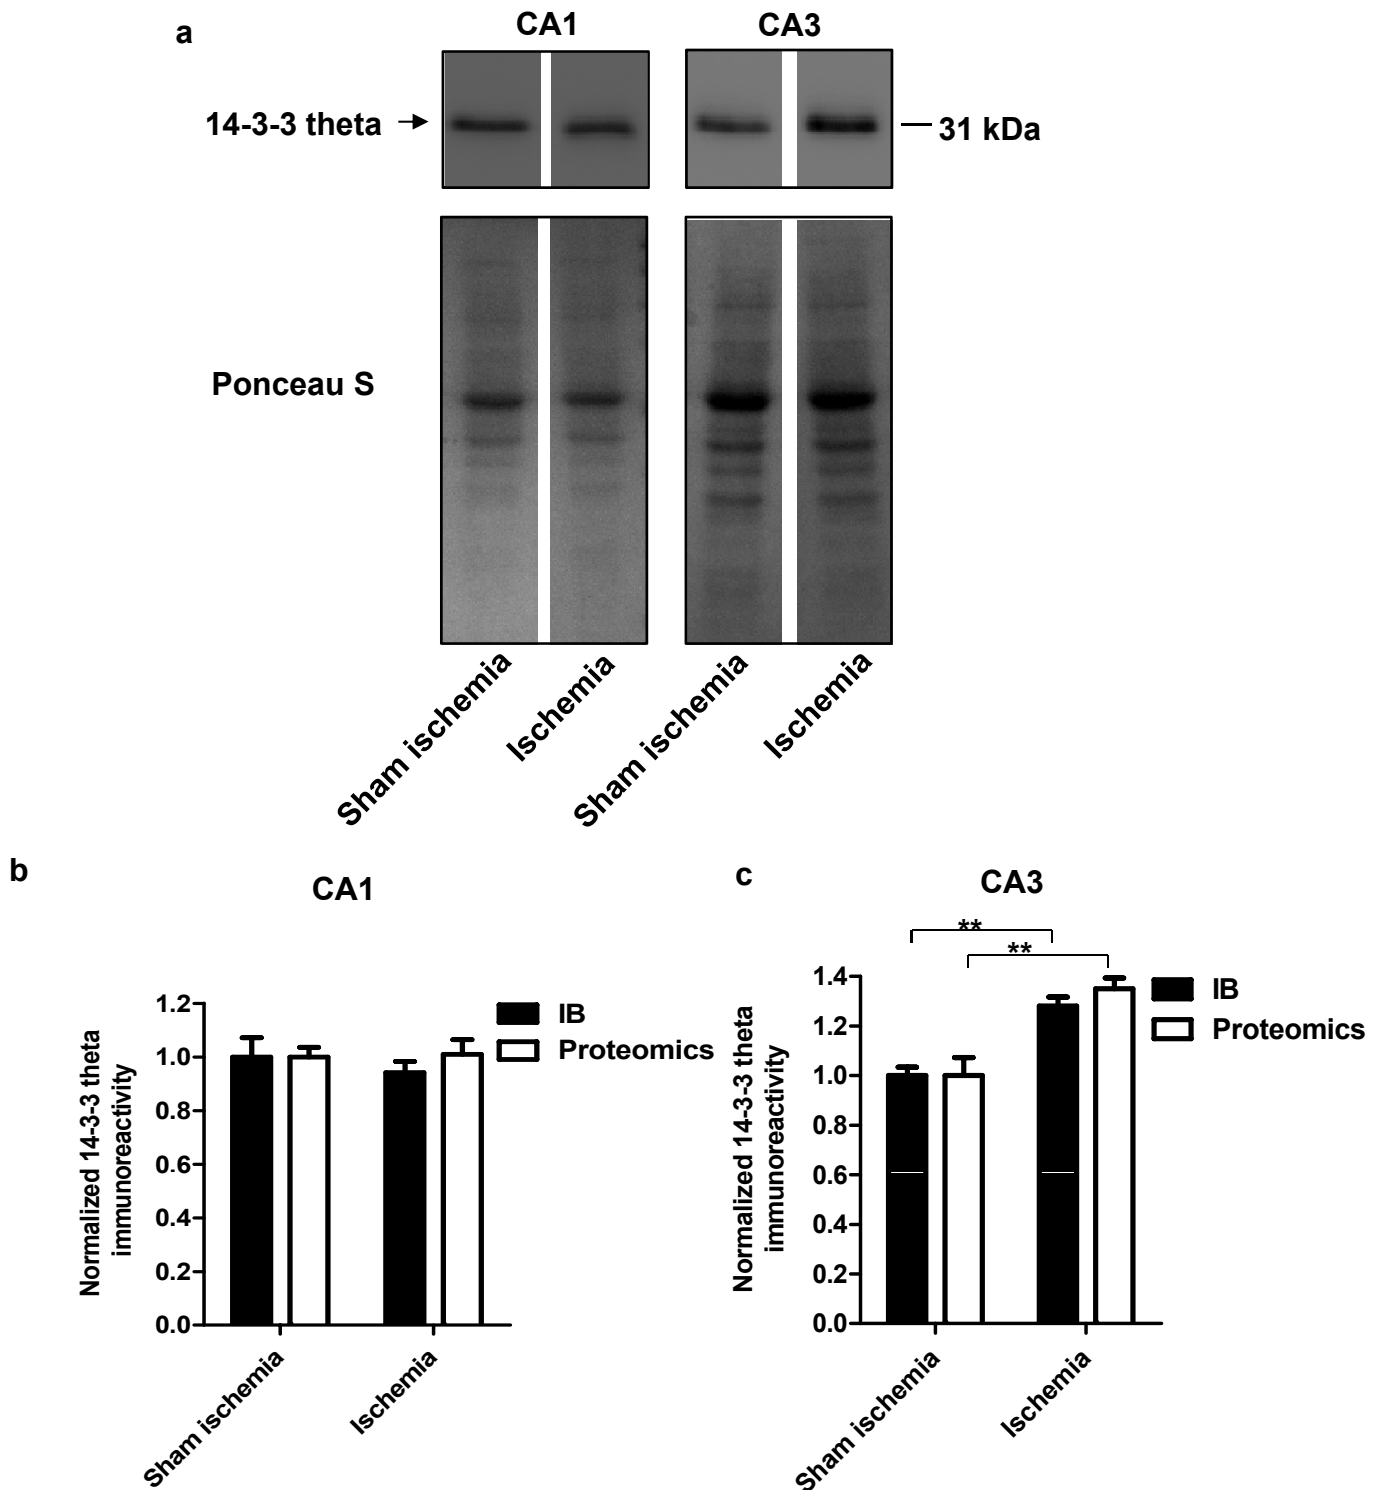

**Selective induction of 14-3-3 theta expression in the CA3 region after ischemia.** (a) Representative immunoblots illustrating the protein expression levels of 14-3-3 theta in CA1 and CA3 cytoplasmic fractions from both sham ischemic and ischemic animals. (b,c) Bar graphs summarizing the immunoblotting (IB) and proteomic results for 14-3-3 theta in the CA1 (b) and CA3 (c) region. The values were corrected to total protein content, determined by Ponceau S staining and normalized such that the expression levels from sham ischemic samples were 1 and are means  $\pm$  S.E.M. for  $n=6$  per group (\*\* $p < 0.01$ , two-tailed t-test).

## Supplementary Figure 7

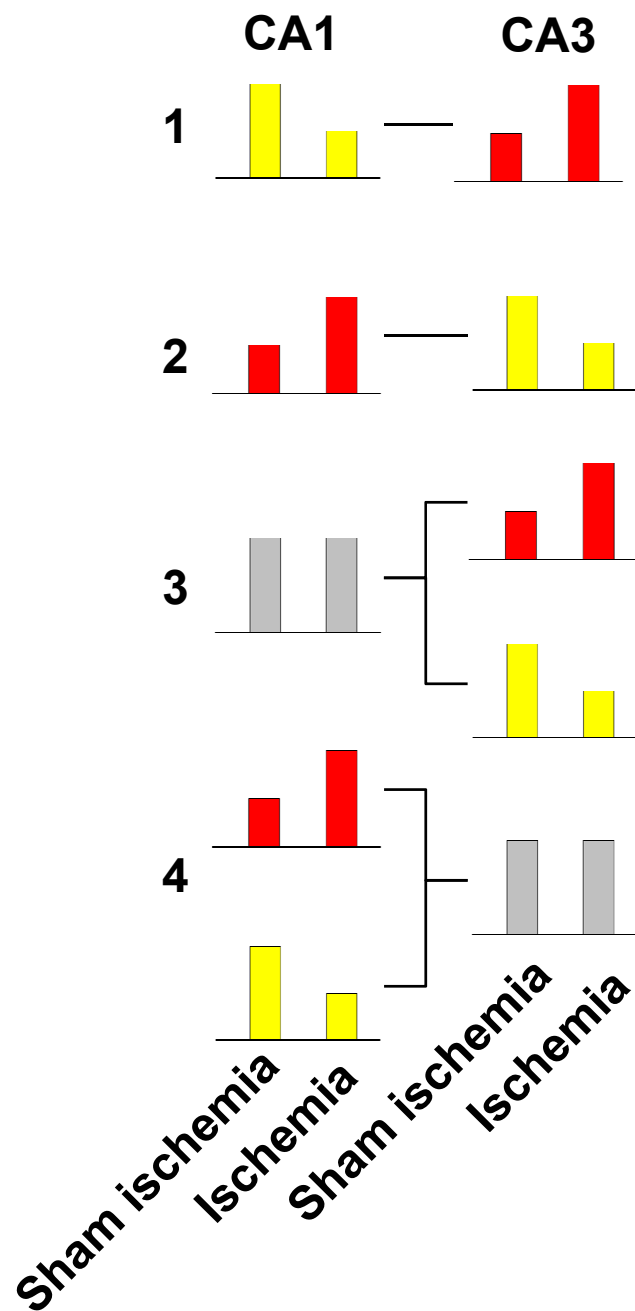

**Selection criteria for the identification of individual proteins associated with the resistive properties of CA3.** Panel shows the selection criteria applied to the proteomic datasets for the identification of individual proteins that were differentially regulated after ischemia in CA1 compared to CA3. (1) downregulated following ischemia in the CA1, but upregulated in the CA3 or (2) vice versa; (3) unaffected following ischemia in the CA1, but either upregulated or downregulated in the CA3 or (4) vice versa.



## Supplementary Figure 8

a

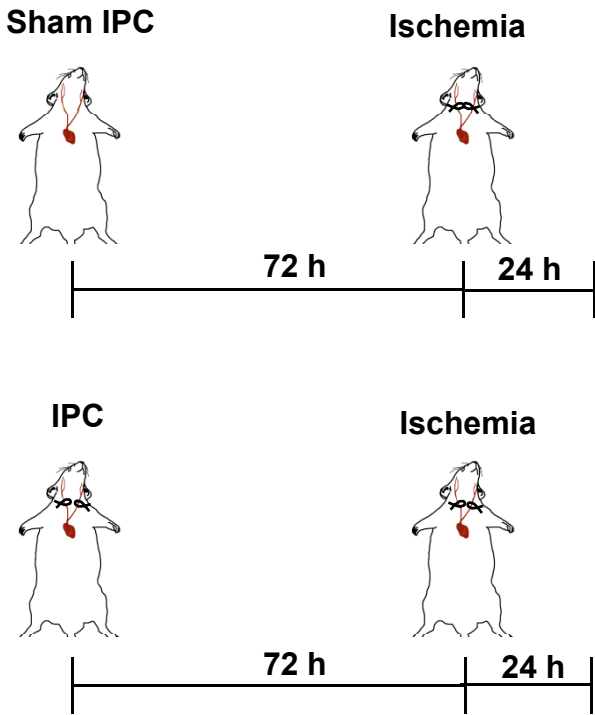

b

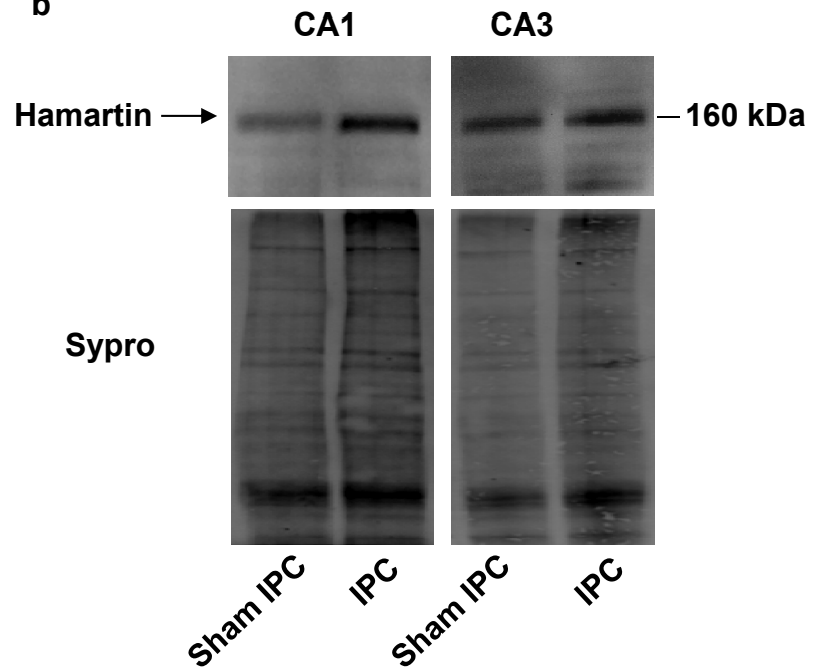

c

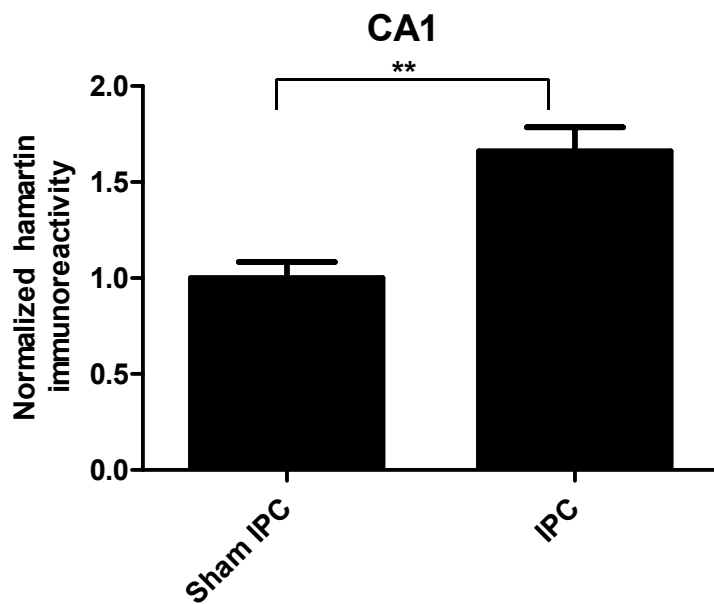

d

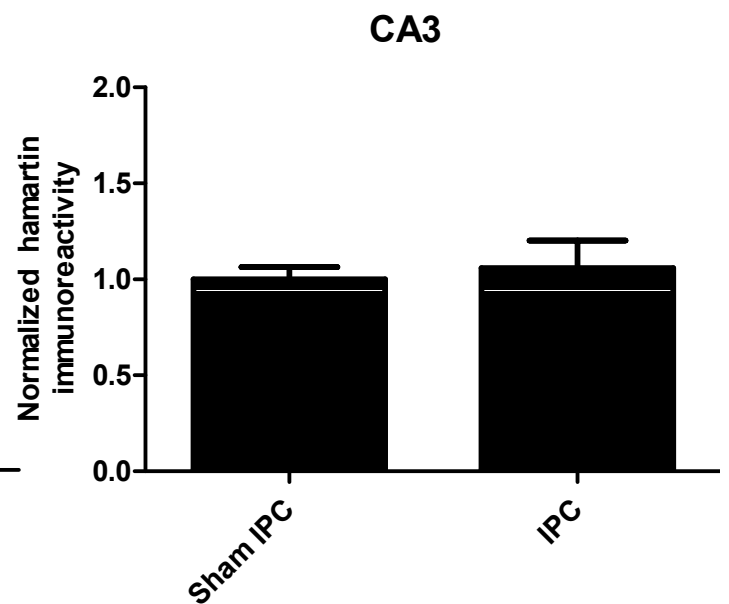

**Hamartin induction in the CA1 following IPC and ischemia.** (a) Experimental design showing rats subjected to either sham IPC or 2 min IPC, followed by 72 h of reperfusion, 10 min injurious ischemia and 24 h of reperfusion. In (b–d), the CA1 and CA3 membrane fractions were analyzed by immunoblotting using anti-hamartin antibodies. (b) Representative immunoblots showing hamartin expression. (c,d) Quantification of hamartin expression from the immunoblotting data for the CA1 (c) and CA3 (d) regions. The values were corrected to total protein content, determined by Sypro staining and were normalized such that expression levels from sham IPC samples was 1 and are means  $\pm$  S.E.M. for  $n=4$  per group (\*\* $p<0.01$ , two-tailed t test).

## Supplementary Figure 9

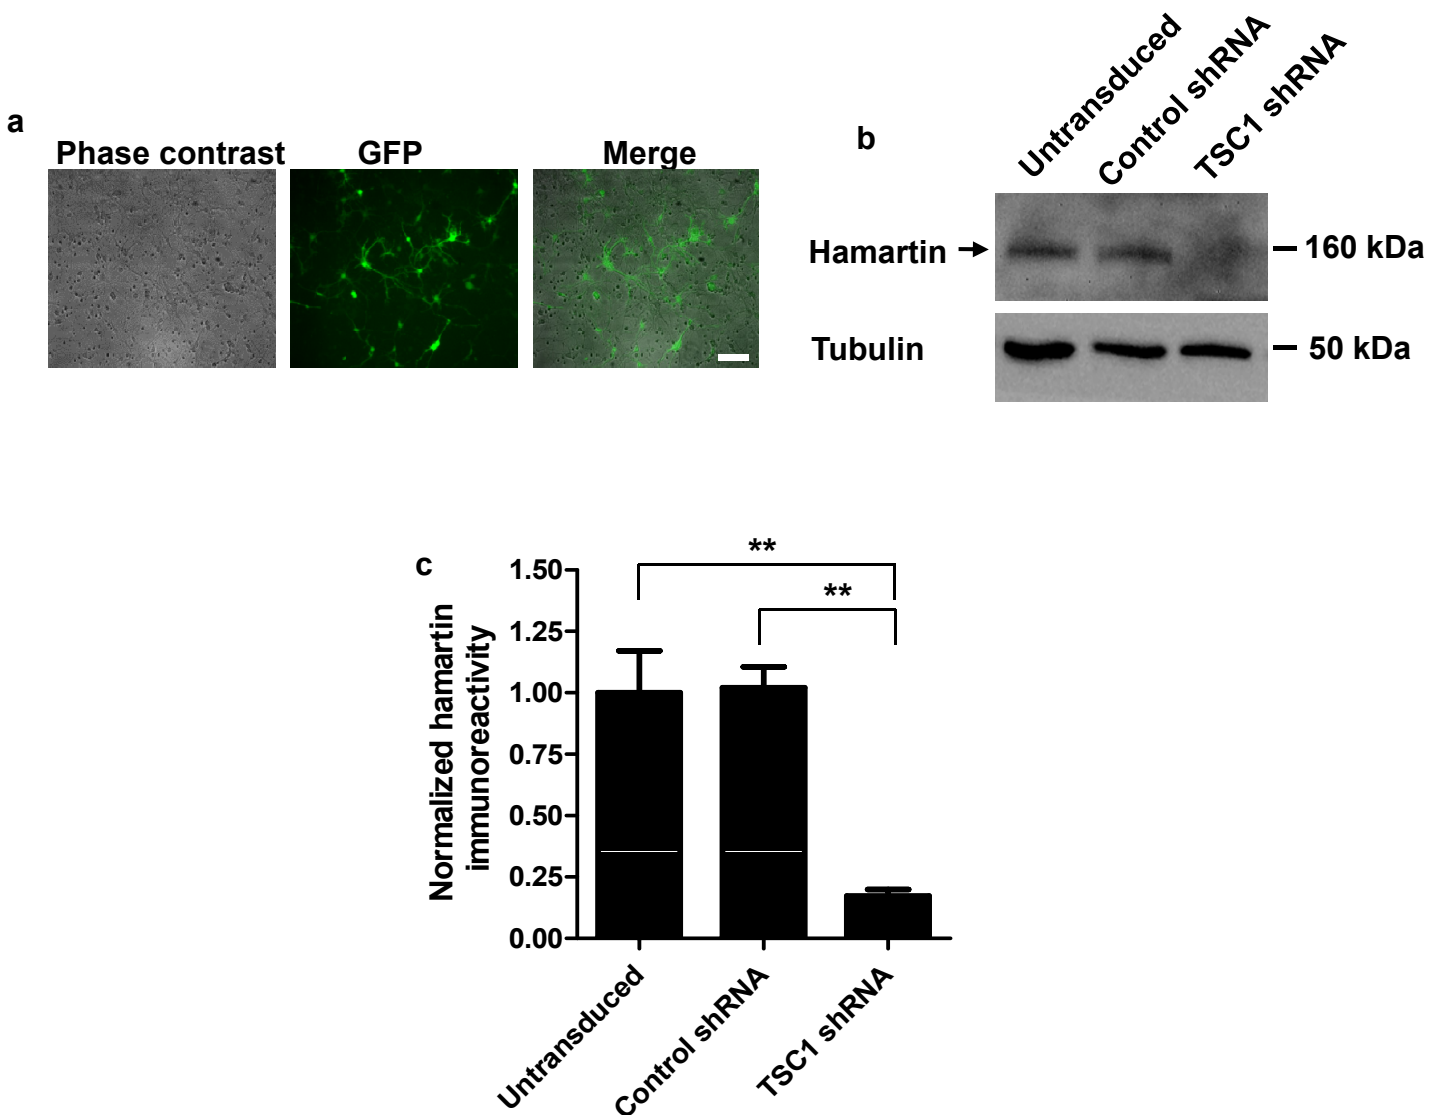

**Suppression efficiency of TSC1 shRNA treated cultures.** (a) Phase contrast and fluorescent images of primary hippocampal neurons transduced with a control pLKO.1 TurboGFP vector (n=2). Merge shows the phase contrast and GFP fluorescence images. Scale bar is 50  $\mu$ m. (b) Representative immunoblots showing hamartin expression in untransduced, control shRNA- and TSC1 shRNA-treated cultures. (c) Densitometric quantification of hamartin expression levels from (b). Tubulin was used as a loading control and expression was normalised so that hamartin immunoreactivity in untransduced cultures was 1 and are means  $\pm$  S.E.M (n=4; one-way ANOVA with Bonferonni post-test, \*\* $p$ <0.01).

## Supplementary Figure 10

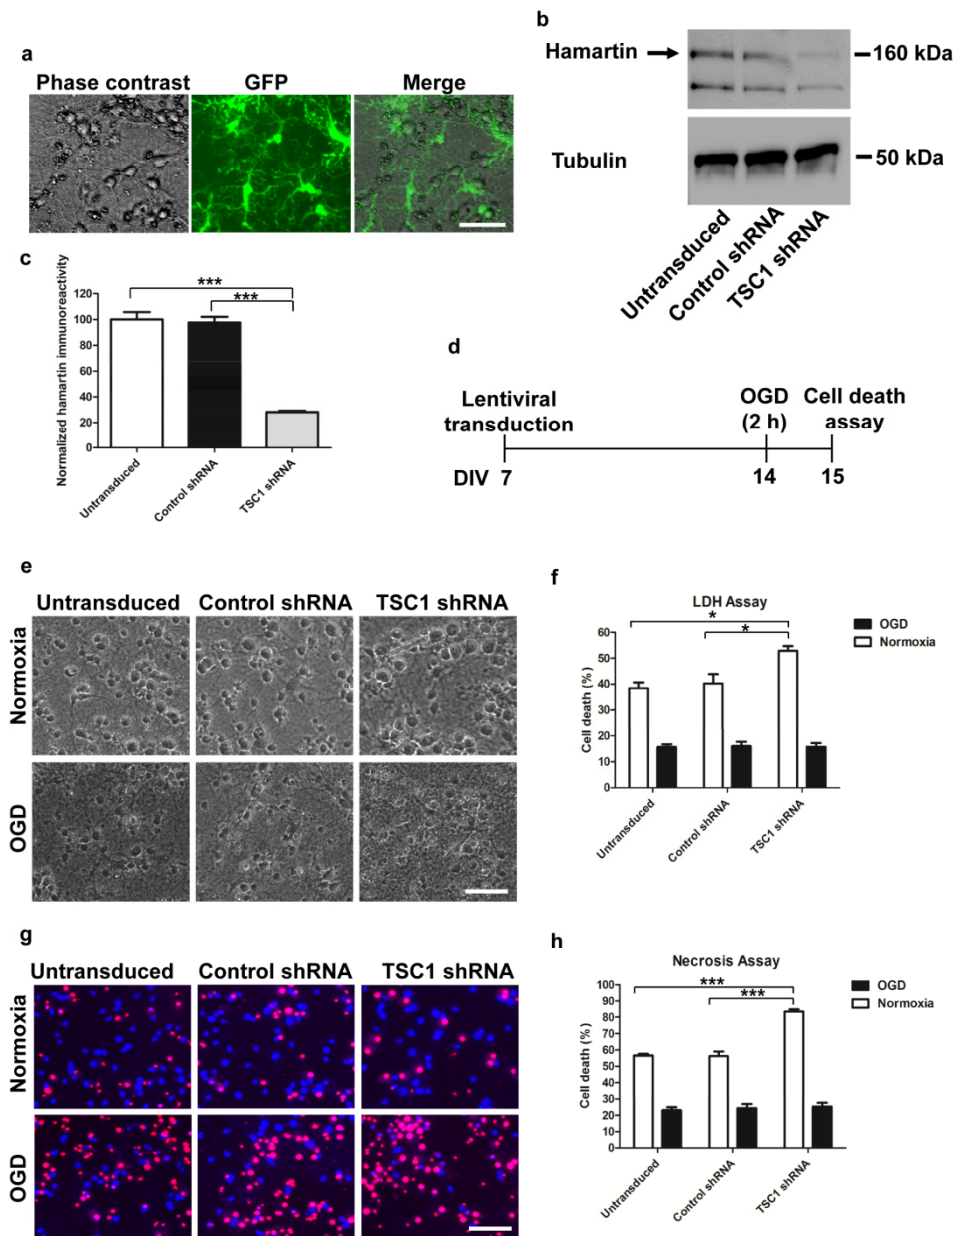

**Increased vulnerability to OGD in primary cortical neurons in which hamartin expression was suppressed.** (a) Phase contrast and immunofluorescent images of primary cortical neurons transduced with pLKO.1 TurboGFP vectors. Merge shows the phase contrast and GFP fluorescence images. (b) Representative immunoblots of hamartin expression from untreated, control shRNA - and TSC1 shRNA-treated cultures. (c) Bar graph summarizing the immunoblotting results. Expression is normalized so that hamartin immunoreactivity in untransduced cultures was 100%. (d–h) Cortical cultures were transduced 7 DIV with lentiviral vectors or remained untreated. At 14 DIV cultures were subjected to 2 h of either OGD or normoxia and cell death was quantified at 24 h of reperfusion. (d) Illustration of the experimental design. (e) Representative phase contrast images of cortical cultures transduced with TSC1 shRNA after 2 h OGD and 24 h of reperfusion. (f) Quantification of cell death by LDH assays showing % cell death in cultures treated with TSC1 shRNA, control shRNA and untransduced cultures. (g) Merged fluorescent images from cultures stained with Hoechst 33342 (blue) and ethidium homodimer III (red). (h) Quantification of cell death expressed as the percentage of neurons in (g) stained with ethidium homodimer III to stained with Hoechst 33342. Scale bars are 50  $\mu$ m. All data are expressed as means  $\pm$  S.E.M. from n=3 (one-way ANOVA with Bonferroni post-test, \* $p$ <0.05, \*\*\* $p$ <0.001).

Supplementary Figure 11

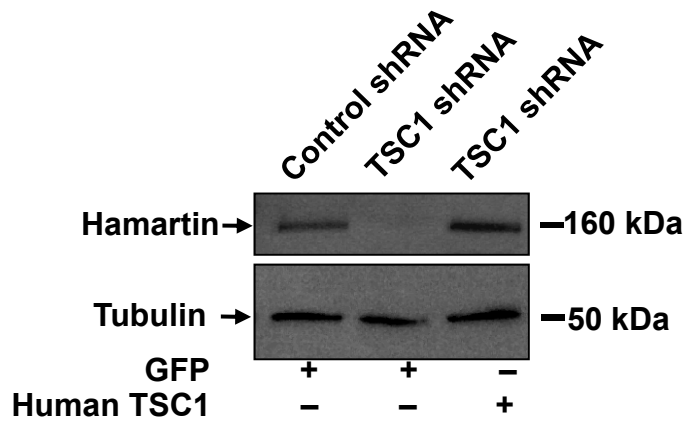

**Rescue of hamartin expression in hippocampal cultures.** Representative immunoblot showing hamartin expression from hippocampal cells treated with both TSC1 shRNA and pEZ-Lv201 human TSC1 lentiviral vectors. GFP is pEZ-LV201 eGFP. Tubulin is loading control.

Supplementary Figure 12

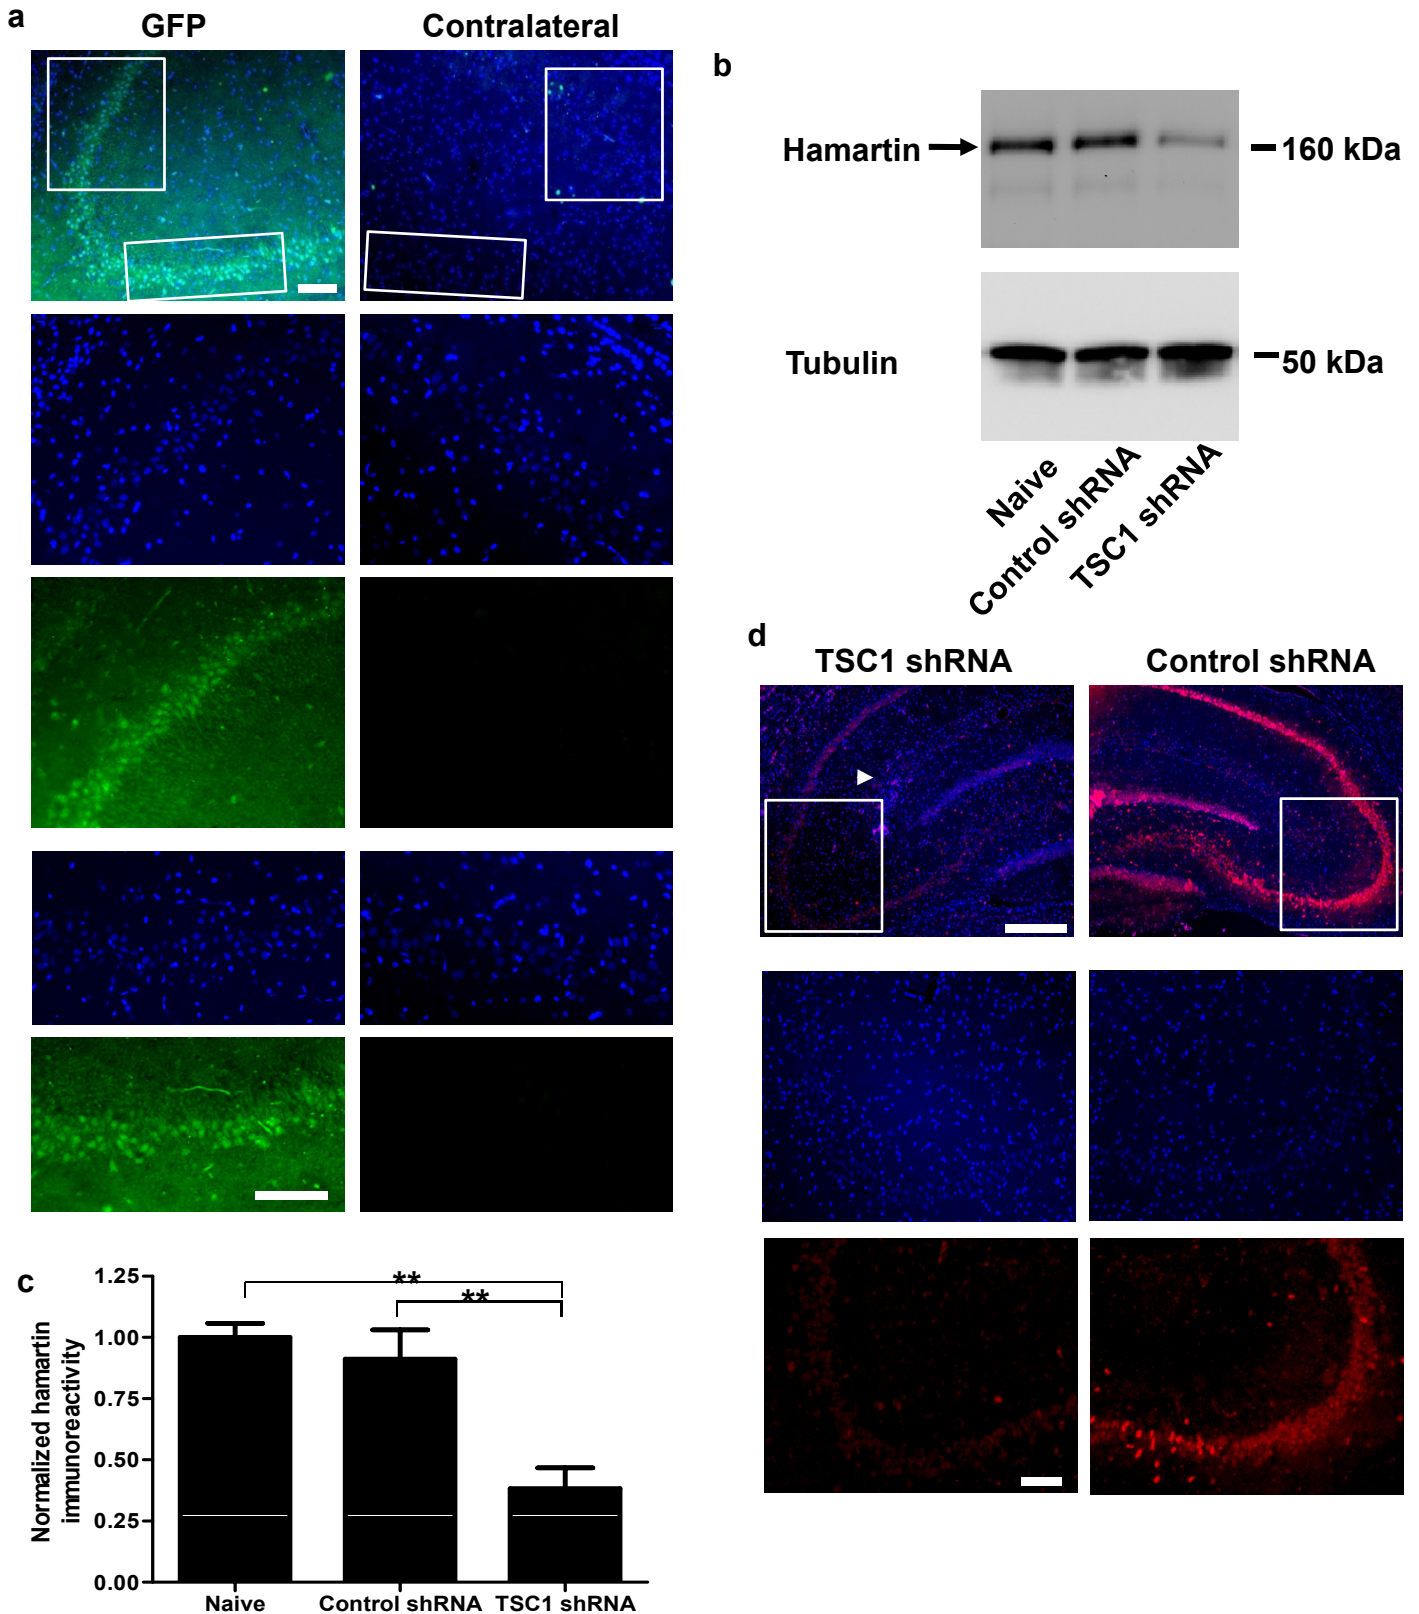

**Attenuation of hamartin expression in CA3 cells.** (a) Representative fluorescence images from coronal sections immunostained with an anti-GFP antibody (green) and counterstained with DAPI (blue) following unilateral injection of control pLKO.1 TurboGFP vectors ( $2.5 \times 10^6$  particles) in CA3, which produced ipsilateral GFP expression. (b) Representative immunoblot from CA3 whole cell homogenates showing hamartin expression and (c) bar graph summarizing the densitometric data. Data were normalised to hamartin immunoreactivity from naïve CA3 cell homogenates. (d) Immunofluorescent images from brain sections immunostained with an anti-hamartin antibody (red) and DAPI (blue) ( $n=3$ ). For (a) scale bars are 0.1 mm for first row panels and 0.01 mm for lower panels. For (d) scale bars are 0.5 mm for first row panels and 0.1 mm for lower panels. Boxes indicate the CA3 regions magnified in the lower panels.

## Supplementary Figure 13

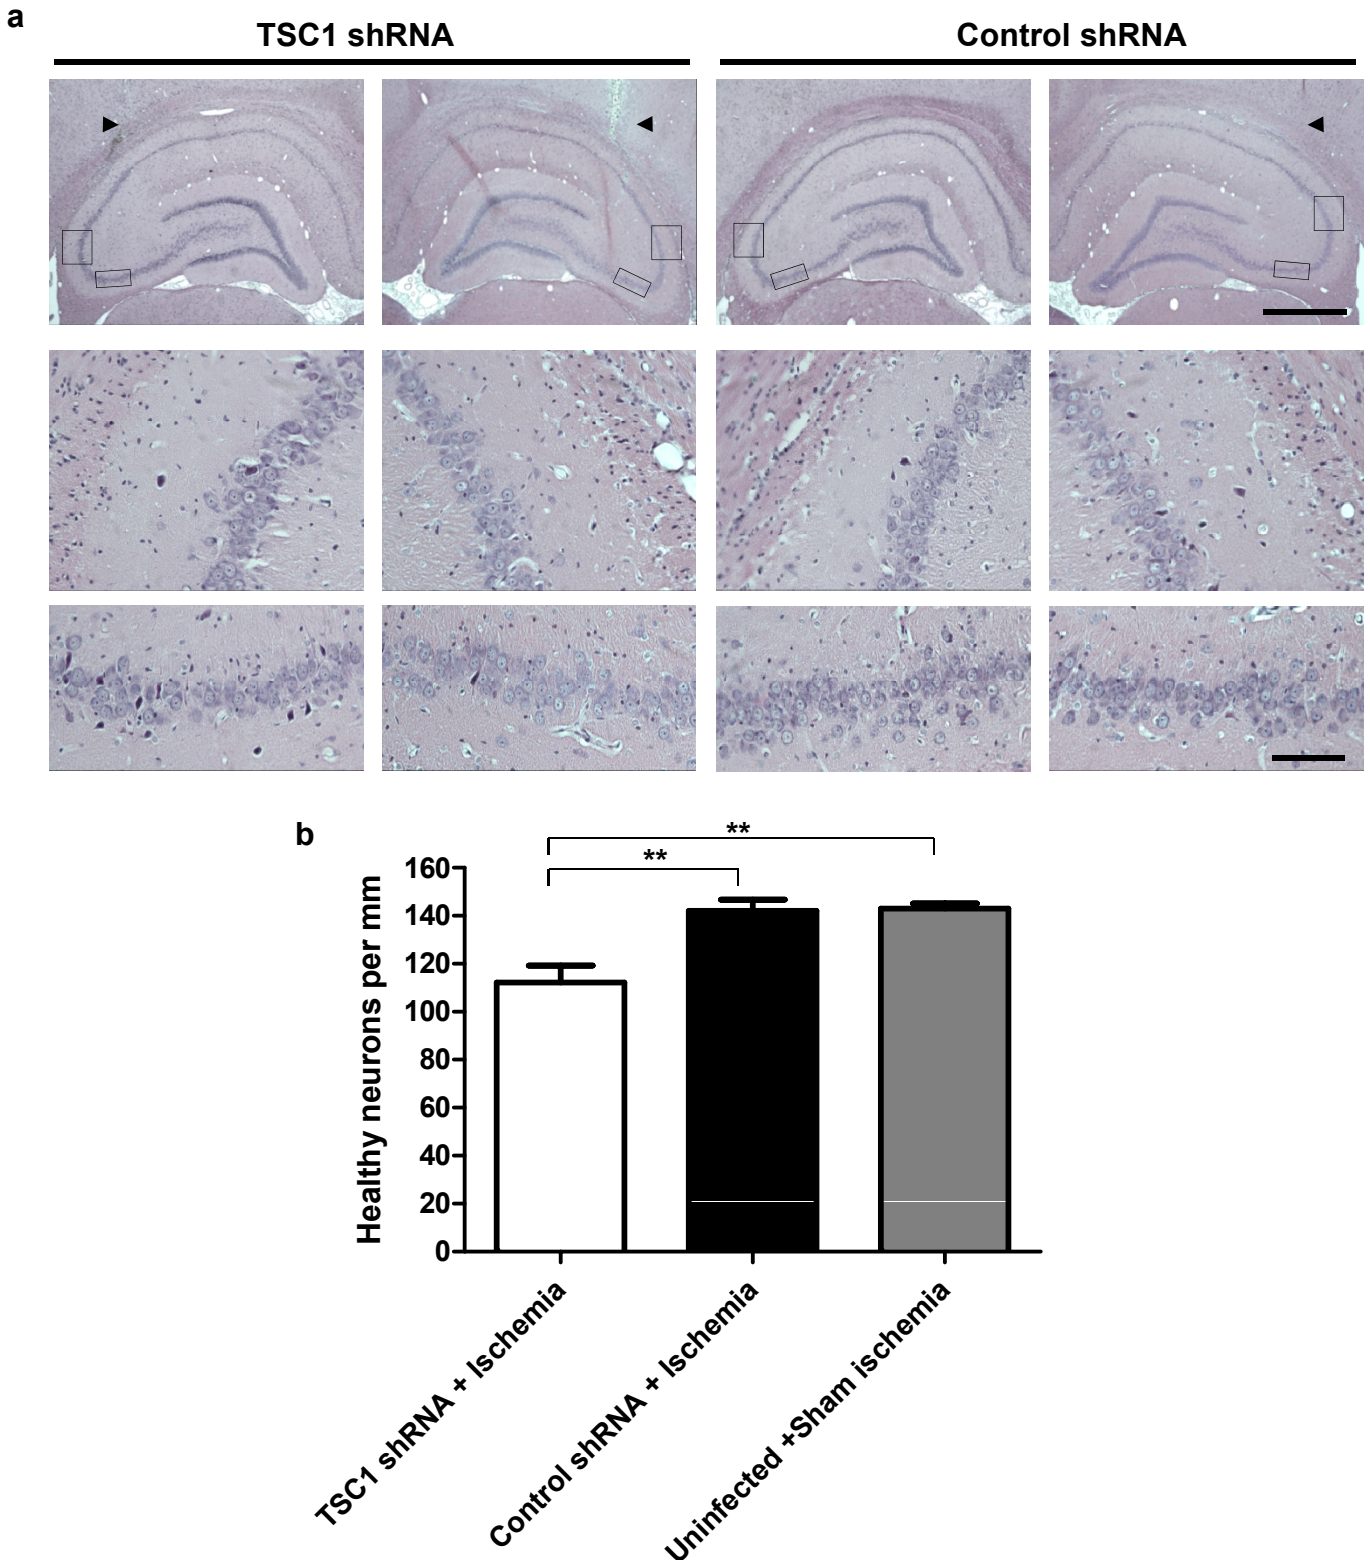

**Reduction of resistance to ischemia in CA3 cells in which hamartin expression was suppressed.** (a) Hematoxylin and eosin stained hippocampal sections from rats administered bilaterally with either TSC1 shRNA (n=6) or Control shRNA (n=4) and after 14 d subjected to 10 min ischemia and 7 d reperfusion. Arrow heads show the needle trace. Boxes indicate the magnified regions displayed in the middle and lower panels. Scale bar for upper panels is 1 mm and for middle and lower panels is 0.01 mm. (b) Quantification of the number of healthy neurons per mm surviving ischemia in the dorsal CA3 pyramidal layer, treated with TSC1 shRNA, compared to control shRNA-treated or uninfected hippocampi subjected to sham ischemia. Data are mean  $\pm$  S.E.M. (one-way ANOVA with Bonferonni post-test, \*\* $p < 0.01$ )

**Supplementary Table 1. Enhanced proteins in the CA1 region compared to the CA3 region of sham ischemic animals.**

| Accession Number | Protein Name                                                            | CA1 Sham: CA3 Sham Ratio | p-value |
|------------------|-------------------------------------------------------------------------|--------------------------|---------|
| O95479           | hexose-6-phosphate dehydrogenase                                        | 4.762                    | 0       |
| Q9Y3Q4           | hyperpolarization activated cyclic nucleotide-gated potassium channel 4 | 3.571                    | 0.01    |
| Q8WZA1           | protein O-linked mannose beta1,2-N-acetylglucosaminyltransferase        | 3.333                    | 0       |
| Q96NW4           | ankyrin repeat domain 27                                                | 2.941                    | 0       |
| Q58EX7           | Puratrophin-1                                                           | 2.632                    | 0       |
| Q15021           | non-SMC condensin I complex, subunit D2                                 | 2.564                    | 0       |
| Q86UL8           | membrane associated guanylate kinase, WW and PDZ domain containing 2    | 2.381                    | 0.02    |
| O14746           | telomerase reverse transcriptase                                        | 1.887                    | 0       |
| Q8TEX9           | importin 4                                                              | 1.818                    | 0.02    |
| P08779           | keratin 16 (focal non-epidermolytic palmoplantar keratoderma)           | 1.754                    | 0       |
| Q86YN6           | peroxisome proliferator-activated receptor gamma, coactivator 1 beta    | 1.724                    | 0.01    |
| O76094           | signal recognition particle 72kDa                                       | 1.695                    | 0       |
| P16435           | P450 (cytochrome) oxidoreductase                                        | 1.639                    | 0.01    |
| Q9BPU6           | dihydropyrimidinase-like 5                                              | 1.613                    | 0       |
| Q14137           | block of proliferation 1                                                | 1.587                    | 0.01    |
| Q14679           | tubulin tyrosine ligase-like family, member 4                           | 1.587                    | 0.02    |
| P54132           | Bloom syndrome                                                          | 1.562                    | 0       |
| Q8NHU6           | tudor domain containing 7                                               | 1.562                    | 0.02    |
| P17812           | CTP synthase                                                            | 1.562                    | 0.03    |
| Q92526           | chaperonin containing TCPI1, subunit 6B (zeta 2)                        | 1.515                    | 0       |
| O95202           | leucine zipper-EF-hand containing transmembrane protein 1               | 1.471                    | 0       |
| Q9UPT6           | mitogen-activated protein kinase 8 interacting protein 3                | 1.471                    | 0       |
| Q96G03           | phosphoglucomutase 2                                                    | 1.471                    | 0       |
| Q9HCK4           | roundabout, axon guidance receptor, homolog 2                           | 1.471                    | 0       |
| Q92540           | Smg-7 homolog, nonsense mediated mRNA decay factor                      | 1.449                    | 0       |
| O75197           | low density lipoprotein receptor-related protein 5                      | 1.429                    | 0       |
| P10721           | v-kit Hardy-Zuckerman 4 feline sarcoma viral oncogene homolog           | 1.429                    | 0.04    |
| Q9NRL2           | bromodomain adjacent to zinc finger domain, 1A                          | 1.408                    | 0       |
| Q9H3U1           | unc-45 homolog A                                                        | 1.408                    | 0.01    |
| O76074           | phosphodiesterase 5A, cGMP-specific                                     | 1.408                    | 0.02    |
| Q9Y3Q0           | N-acetylated alpha-linked acidic dipeptidase 2                          | 1.408                    | 0.04    |
| O75473           | leucine-rich repeat-containing G protein-coupled receptor 5             | 1.389                    | 0.02    |
| Q8TEW8           | par-3 partitioning defective 3 homolog B                                | 1.37                     | 0.01    |
| Q5JTH9           | ribosomal RNA processing 12 homolog                                     | 1.37                     | 0.01    |
| Q8TEL6           | transient receptor potential cation channel, subfamily C,               | 1.351                    | 0       |
| Q9Y613           | formin homology 2 domain containing 1                                   | 1.316                    | 0       |
| Q8TCU5           | glutamate receptor, ionotropic, N-methyl-D-aspartate 3A                 | 1.316                    | 0       |
| Q92839           | hyaluronan synthase 1                                                   | 1.316                    | 0       |
| O95025           | sema domain, immunoglobulin domain (Ig)                                 | 1.316                    | 0       |
| Q14324           | myosin binding protein C, fast type                                     | 1.316                    | 0.01    |
| O94953           | jumonji domain containing 2B                                            | 1.299                    | 0       |
| Q96CW5           | tubulin, gamma complex associated protein 3                             | 1.282                    | 0       |
| O15439           | ATP-binding cassette, sub-family C (CFTR/MRP), member 4                 | 1.266                    | 0       |
| P61158           | ARP3 actin-related protein 3 homolog                                    | 1.266                    | 0       |
| O60477           | deleted in bladder cancer 1                                             | 1.266                    | 0       |
| O76041           | nebullette                                                              | 1.266                    | 0       |
| P46934           | neural precursor cell expressed, developmentally down-regulated 4       | 1.266                    | 0       |
| Q9BRZ2           | tripartite motif-containing 56                                          | 1.266                    | 0       |

|        |                                                                     |       |      |
|--------|---------------------------------------------------------------------|-------|------|
| Q13620 | cullin 4B                                                           | 1.266 | 0.01 |
| O75820 | zinc finger protein 189                                             | 1.266 | 0.02 |
| O75746 | solute carrier family 25 (mitochondrial carrier, Aralar), member 12 | 1.266 | 0.04 |
| P43405 | spleen tyrosine kinase                                              | 1.266 | 0.04 |
| P07996 | thrombospondin 1                                                    | 1.266 | 0.04 |
| O60879 | diaphanous homolog 2                                                | 1.25  | 0    |
| P41594 | glutamate receptor, metabotropic 5                                  | 1.25  | 0    |
| Q12772 | sterol regulatory element binding transcription factor 2            | 1.25  | 0    |
| O94973 | adaptor-related protein complex 2, alpha 2 subunit                  | 1.25  | 0.01 |
| O00391 | quiescin Q6 sulfhydryl oxidase 1                                    | 1.25  | 0.02 |
| Q96NW7 | leucine rich repeat containing 7                                    | 1.25  | 0.03 |
| Q92696 | Rab geranylgeranyltransferase, alpha subunit                        | 1.25  | 0.03 |
| Q12931 | TNF receptor-associated protein 1                                   | 1.235 | 0.02 |
| Q8TD31 | coiled-coil alpha-helical rod protein 1                             | 1.235 | 0.03 |
| P02538 | keratin 6A                                                          | 1.235 | 0.03 |
| Q8NE62 | choline dehydrogenase                                               | 1.22  | 0.01 |
| Q08211 | DEAH (Asp-Glu-Ala-His) box polypeptide 9                            | 1.22  | 0.01 |
| Q6VAB6 | kinase suppressor of ras 2                                          | 1.22  | 0.03 |
| P17948 | fms-related tyrosine kinase 1                                       | 1.22  | 0.04 |
| Q13619 | cullin 4A                                                           | 1.205 | 0    |
| P52306 | RAP1, GTP-GDP dissociation stimulator 1                             | 1.205 | 0    |
| Q13751 | laminin, beta 3                                                     | 1.205 | 0.02 |
| Q86UU1 | pleckstrin homology-like domain, family B, member 1                 | 1.205 | 0.02 |
| Q9Y6K5 | 2'-5'-oligoadenylate synthetase 3, 100kDa                           | 1.205 | 0.04 |
| Q9UNM6 | proteasome (prosome, macropain) 26S subunit, non-ATPase, 13         | 1.205 | 0.04 |
| Q7Z3E2 | chromosome 10 open reading frame 118                                | 1.19  | 0    |
| P09104 | enolase 2 (gamma, neuronal)                                         | 1.19  | 0    |
| Q96PE3 | inositol polyphosphate-4-phosphatase, type I, 107kDa                | 1.19  | 0    |
| O95819 | mitogen-activated protein kinase kinase kinase kinase 4             | 1.19  | 0    |
| P07949 | ret proto-oncogene                                                  | 1.19  | 0    |
| Q13464 | Rho-associated, coiled-coil containing protein kinase 1             | 1.19  | 0    |
| P54098 | polymerase (DNA directed), gamma                                    | 1.19  | 0.01 |
| P18206 | vinculin                                                            | 1.19  | 0.01 |
| O60645 | exocyst complex component 3                                         | 1.19  | 0.03 |
| P00338 | lactate dehydrogenase A                                             | 1.19  | 0.03 |
| O00206 | toll-like receptor 4                                                | 1.19  | 0.03 |
| Q8N4X5 | actin filament associated protein 1-like 2                          | 1.19  | 0.04 |
| Q9HCS7 | XPA binding protein 2                                               | 1.19  | 0.04 |
| Q9H7Z3 | chromosome 14 open reading frame 102                                | 1.176 | 0.01 |
| P51523 | zinc finger protein 84                                              | 1.176 | 0.01 |
| Q13618 | cullin 3                                                            | 1.176 | 0.02 |
| O95461 | like-glycosyltransferase                                            | 1.176 | 0.04 |
| Q9BXL6 | caspase recruitment domain family, member 14                        | 1.163 | 0    |
| Q9UJA3 | minichromosome maintenance complex component 8                      | 1.163 | 0    |
| Q9UM54 | myosin VI                                                           | 1.163 | 0    |
| Q9H2G2 | STE20-like kinase                                                   | 1.163 | 0    |
| P29322 | EPH receptor A8                                                     | 1.163 | 0.01 |
| P20702 | integrin, alpha X (complement component 3 receptor 4 subunit)       | 1.163 | 0.01 |
| Q9Y239 | nucleotide-binding oligomerization domain containing 1              | 1.163 | 0.01 |
| O95153 | benzodiazapine receptor (peripheral) associated protein 1           | 1.163 | 0.02 |



|        |                                                                           |       |      |
|--------|---------------------------------------------------------------------------|-------|------|
| Q9Y2I6 | ninein-like                                                               | 1.163 | 0.02 |
| P16234 | platelet-derived growth factor receptor, alpha polypeptide                | 1.163 | 0.03 |
| Q01118 | sodium channel, voltage-gated, type VII, alpha                            | 1.163 | 0.03 |
| O00418 | eukaryotic elongation factor-2 kinase                                     | 1.163 | 0.04 |
| P12277 | creatine kinase, brain                                                    | 1.149 | 0    |
| Q13948 | cut-like homeobox 1                                                       | 1.149 | 0    |
| Q12768 | KIAA0196                                                                  | 1.149 | 0    |
| O00160 | myosin IF                                                                 | 1.149 | 0    |
| P36956 | sterol regulatory element binding transcription factor 1                  | 1.149 | 0.01 |
| P78524 | suppression of tumorigenicity 5                                           | 1.149 | 0.02 |
| P22314 | ubiquitin-like modifier activating enzyme 1                               | 1.149 | 0.02 |
| P35913 | phosphodiesterase 6B, cGMP-specific, rod, beta                            | 1.149 | 0.03 |
| Q6IQ26 | RAB6 interacting protein 1                                                | 1.149 | 0.03 |
| Q9HBT7 | zinc finger protein 287                                                   | 1.149 | 0.03 |
| Q10567 | adaptor-related protein complex 1, beta 1 subunit                         | 1.136 | 0    |
| Q9Y597 | potassium channel tetramerisation domain containing 3                     | 1.136 | 0.02 |
| P29474 | nitric oxide synthase 3 (endothelial cell)                                | 1.136 | 0.02 |
| Q9UNY4 | transcription termination factor, RNA polymerase II                       | 1.136 | 0.03 |
| P14868 | aspartyl-tRNA synthetase                                                  | 1.136 | 0.04 |
| P30153 | protein phosphatase 2 (formerly 2A), regulatory subunit A , alpha isoform | 1.136 | 0.04 |
| P46020 | phosphorylase kinase, alpha 1                                             | 1.136 | 0.04 |
| Q14644 | RAS p21 protein activator 3                                               | 1.136 | 0.04 |
| P43304 | glycerol-3-phosphate dehydrogenase 2 (mitochondrial)                      | 1.124 | 0    |
| Q14146 | KIAA0133                                                                  | 1.124 | 0    |
| Q96FN5 | kinesin family member 12                                                  | 1.124 | 0.04 |
| Q99707 | 5-methyltetrahydrofolate-homocysteine methyltransferase                   | 1.124 | 0.04 |
| Q9BXT6 | Mov10l1, Moloney leukemia virus 10-like 1, homolog                        | 1.124 | 0.04 |
| P63010 | adaptor-related protein complex 2, beta 1 subunit                         | 1.111 | 0.01 |
| O14976 | cyclin G associated kinase                                                | 1.111 | 0.01 |
| Q05586 | glutamate receptor, ionotropic, N-methyl D-aspartate 1                    | 1.111 | 0.01 |
| P60174 | triosephosphate isomerase 1                                               | 1.111 | 0.01 |
| Q8WTW3 | component of oligomeric golgi complex 1                                   | 1.111 | 0.02 |
| Q9Y4D1 | dishevelled associated activator of morphogenesis 1                       | 1.111 | 0.02 |
| Q9BWT7 | caspase recruitment domain family, member 10                              | 1.111 | 0.03 |
| Q9BZ76 | contactin associated protein-like 3                                       | 1.111 | 0.03 |
| Q9P2S2 | neurexin 2                                                                | 1.111 | 0.03 |
| Q9UKV0 | histone deacetylase 9                                                     | 1.111 | 0.04 |
| Q12965 | myosin IE                                                                 | 1.111 | 0.04 |

**Supplementary Table 2. Enhanced proteins in the CA3 region relative to the CA1 region of sham ischemic animals.**

| Accession Number | Protein Name                                                 | CA3 Sham: CA1 Sham Ratio | p-value |
|------------------|--------------------------------------------------------------|--------------------------|---------|
| P31946           | 14-3-3 beta                                                  | 6.82                     | 0       |
| Q07075           | glutamyl aminopeptidase                                      | 5.87                     | 0       |
| O75717           | WD repeat and HMG-box DNA binding protein 1                  | 3.1                      | 0       |
| O43566           | regulator of G-protein signaling 14                          | 2.46                     | 0       |
| Q99665           | interleukin 12 receptor beta 2                               | 2.34                     | 0       |
| P19013           | keratin 4                                                    | 1.99                     | 0       |
| Q96IZ5           | RNA binding motif protein 41                                 | 1.95                     | 0       |
| Q8WUM0           | nucleoporin 133kDa                                           | 1.9                      | 0.01    |
| Q8WXD9           | CASK interacting protein 1                                   | 1.86                     | 0.04    |
| Q9HBL0           | <i>tensin 1</i>                                              | 1.7                      | 0.01    |
| P78332           | RNA binding motif protein 6                                  | 1.57                     | 0       |
| Q9ULE6           | KIAA1274                                                     | 1.55                     | 0.01    |
| Q9P202           | deafness, autosomal recessive 31                             | 1.54                     | 0       |
| P13645           | keratin 10                                                   | 1.54                     | 0       |
| Q9UIF3           | tektin 2 (testicular)                                        | 1.54                     | 0       |
| Q9Y2X7           | G protein-coupled receptor kinase interactor 1               | 1.51                     | 0       |
| P04406           | glyceraldehyde-3-phosphate dehydrogenase                     | 1.49                     | 0       |
| Q7Z4K8           | tripartite motif-containing 46                               | 1.49                     | 0       |
| O60231           | DEAH (Asp-Glu-Ala-His) box polypeptide 16                    | 1.48                     | 0.01    |
| Q6PL18           | ATPase family, AAA domain containing 2                       | 1.48                     | 0.03    |
| Q9NY65           | tubulin, alpha 8                                             | 1.46                     | 0       |
| O00159           | myosin IC                                                    | 1.42                     | 0       |
| O14924           | regulator of G-protein signaling 12                          | 1.39                     | 0.01    |
| Q16720           | ATPase, Ca <sup>++</sup> transporting, plasma membrane 3     | 1.38                     | 0       |
| O94909           | microtubule associated monooxygenase 3                       | 1.38                     | 0       |
| Q07157           | tight junction protein 1                                     | 1.35                     | 0       |
| P49588           | alanyl-tRNA synthetase                                       | 1.35                     | 0.04    |
| O43242           | proteasome (prosome, macropain) 26S subunit, non-ATPase, 3   | 1.34                     | 0.01    |
| Q86Y38           | xylosyltransferase I                                         | 1.34                     | 0.02    |
| P00367           | glutamate dehydrogenase 1                                    | 1.32                     | 0       |
| Q96RT1           | erbB2 interacting protein                                    | 1.31                     | 0       |
| Q9NYY8           | FAST kinase domains 2                                        | 1.31                     | 0       |
| Q96JC1           | vacuolar protein sorting 39 homolog ( <i>S. cerevisiae</i> ) | 1.31                     | 0.01    |
| Q92523           | carnitine palmitoyltransferase 1B (muscle)                   | 1.31                     | 0.02    |
| Q5W0U4           | B-box and SPRY domain containing                             | 1.31                     | 0.03    |
| Q02763           | TEK tyrosine kinase, endothelial                             | 1.3                      | 0.02    |
| P23677           | inositol 1,4,5-trisphosphate 3-kinase A                      | 1.3                      | 0.03    |
| Q9BY66           | jumonji, AT rich interactive domain 1D                       | 1.28                     | 0       |
| P08581           | met proto-oncogene (hepatocyte growth factor receptor)       | 1.28                     | 0       |
| Q9H2T7           | RAN binding protein 17                                       | 1.27                     | 0.01    |
| Q96BY7           | ATG2 autophagy related 2 homolog B                           | 1.27                     | 0.02    |
| P39900           | matrix metalloproteinase 12                                  | 1.27                     | 0.04    |
| Q6PI48           | aspartyl-tRNA synthetase 2, mitochondrial                    | 1.26                     | 0       |
| O75533           | splicing factor 3b, subunit 1, 155kDa                        | 1.26                     | 0       |
| O75093           | slit homolog 1 ( <i>Drosophila</i> )                         | 1.26                     | 0       |
| Q16822           | phosphoenolpyruvate carboxykinase 2 (mitochondrial)          | 1.26                     | 0.01    |
| P17858           | phosphofructokinase                                          | 1.25                     | 0.01    |
| P19012           | keratin 15                                                   | 1.25                     | 0       |
| Q13885           | tubulin, beta 2A                                             | 1.25                     | 0       |

|        |                                                                  |      |      |
|--------|------------------------------------------------------------------|------|------|
| Q9BVA1 | tubulin, beta 2B                                                 | 1.25 | 0    |
| Q05639 | eukaryotic translation elongation factor 1 alpha 2               | 1.25 | 0.04 |
| Q9H0K1 | SNF1-like kinase 2                                               | 1.23 | 0    |
| Q13233 | mitogen-activated protein kinase kinase kinase 1                 | 1.23 | 0.01 |
| Q15020 | squamous cell carcinoma antigen recognized by T cells 3          | 1.23 | 0.01 |
| Q96Q42 | amyotrophic lateral sclerosis 2 (juvenile)                       | 1.22 | 0    |
| Q8IY63 | angiomin like 1                                                  | 1.22 | 0    |
| Q9Y2G3 | ATPase, class VI, type 11B                                       | 1.22 | 0    |
| Q00341 | high density lipoprotein binding protein (vigilin)               | 1.22 | 0    |
| P00558 | phosphoglycerate kinase 1                                        | 1.22 | 0    |
| Q13972 | Ras protein-specific guanine nucleotide-releasing factor 1       | 1.22 | 0    |
| Q9NVE7 | pantothenate kinase 4                                            | 1.22 | 0.01 |
| O00411 | polymerase (RNA) mitochondrial (DNA directed)                    | 1.22 | 0.01 |
| Q16706 | mannosidase, alpha, class 2A, member 1                           | 1.22 | 0.04 |
| P39086 | glutamate receptor, ionotropic, kainate 1                        | 1.21 | 0    |
| P23458 | Janus kinase 1 (a protein tyrosine kinase)                       | 1.21 | 0    |
| P12235 | solute carrier family 25 member 4                                | 1.21 | 0    |
| O75334 | protein tyrosine phosphatase, alpha 2                            | 1.21 | 0.02 |
| Q9NPG3 | ubiquitin 1                                                      | 1.21 | 0.03 |
| O94983 | calmodulin binding transcription activator 2                     | 1.2  | 0.01 |
| Q9UIA9 | exportin 7                                                       | 1.2  | 0.01 |
| Q9BZZ5 | apoptosis inhibitor 5                                            | 1.2  | 0.02 |
| Q5VUB5 | chromosome 10 open reading frame 38                              | 1.2  | 0.02 |
| Q12882 | dihydropyrimidine dehydrogenase                                  | 1.2  | 0.02 |
| P50416 | carnitine palmitoyltransferase 1A (liver)                        | 1.2  | 0.04 |
| Q9UM73 | anaplastic lymphoma receptor tyrosine kinase                     | 1.19 | 0    |
| Q86UW7 | Ca <sup>2+</sup> -dependent activator protein for secretion 2    | 1.19 | 0    |
| O15455 | toll-like receptor 3                                             | 1.19 | 0    |
| Q9BZF9 | uveal autoantigen with coiled-coil domains and ankyrin repeats   | 1.19 | 0    |
| Q14587 | zinc finger protein 268                                          | 1.19 | 0.01 |
| Q96J65 | ATP-binding cassette, sub-family C (CFTR/MRP), member 12         | 1.19 | 0.02 |
| Q8TEK3 | DOT1-like, histone H3 methyltransferase ( <i>S. cerevisiae</i> ) | 1.19 | 0.03 |
| Q8TEQ6 | gem (nuclear organelle) associated protein 5                     | 1.19 | 0.04 |
| P33176 | kinesin family member 5B                                         | 1.19 | 0.04 |
| P13929 | enolase 3 (beta, muscle)                                         | 1.17 | 0    |
| P20594 | natriuretic peptide receptor B/guanylate cyclase B               | 1.17 | 0    |
| O43295 | SLIT-ROBO Rho GTPase activating protein 3                        | 1.17 | 0    |
| P61981 | tyrosine 3-monooxygenase gamma polypeptide                       | 1.17 | 0    |
| Q05481 | zinc finger protein 91                                           | 1.17 | 0.02 |
| Q96P47 | centaurin, gamma 3                                               | 1.17 | 0.04 |
| P11142 | heat shock 70kDa protein 8                                       | 1.16 | 0    |
| Q9UGL1 | jumonji, AT rich interactive domain 1B                           | 1.16 | 0    |
| Q7Z2Y5 | Nik related kinase                                               | 1.16 | 0    |
| Q13748 | tubulin, alpha 3c                                                | 1.16 | 0    |
| Q13509 | tubulin, beta 3                                                  | 1.16 | 0    |
| Q9BZF3 | oxysterol binding protein-like 6                                 | 1.16 | 0.01 |
| Q16352 | internexin neuronal intermediate filament protein, alpha         | 1.16 | 0.02 |
| Q96RT8 | tubulin, gamma complex associated protein 5                      | 1.16 | 0.04 |
| Q70CQ4 | ubiquitin specific peptidase 31                                  | 1.16 | 0.04 |
| P08183 | ATP-binding cassette, sub-family B (MDR/TAP), member 1           | 1.15 | 0    |
| P25705 | ATP synthase, H <sup>+</sup> transporting, alpha subunit 1       | 1.15 | 0    |
| Q9BYP7 | WNK lysine deficient protein kinase 3                            | 1.15 | 0    |
| O15438 | ATP-binding cassette, sub-family C (CFTR/MRP), member 3          | 1.15 | 0.01 |
| Q8N1F7 | nucleoporin 93kDa                                                | 1.15 | 0.01 |
| Q15431 | synaptonemal complex protein 1                                   | 1.15 | 0.01 |
| P68371 | tubulin, beta 2C                                                 | 1.15 | 0.01 |
| O60706 | ATP-binding cassette, sub-family C (CFTR/MRP), member 9          | 1.15 | 0.02 |

|        |                                                                        |      |      |
|--------|------------------------------------------------------------------------|------|------|
| Q9NTI2 | ATPase, aminophospholipid transporter-like, class I, type 8A, member 2 | 1.15 | 0.02 |
| O75747 | phosphoinositide-3-kinase, class 2, gamma polypeptide                  | 1.15 | 0.02 |
| P11216 | phosphorylase, glycogen; brain                                         | 1.15 | 0.02 |
| Q8TEQ8 | phosphatidylinositol glycan anchor biosynthesis, class O               | 1.15 | 0.03 |
| Q9H267 | vacuolar protein sorting 33 homolog B (yeast)                          | 1.15 | 0.04 |
| P33992 | minichromosome maintenance complex component 5                         | 1.15 | 0.04 |
| Q7L2E3 | DEAH (Asp-Glu-Ala-His) box polypeptide 30                              | 1.14 | 0    |
| Q5JR59 | KIAA0774                                                               | 1.14 | 0    |
| Q9BUF5 | tubulin, beta 6                                                        | 1.14 | 0    |
| Q7Z460 | cytoplasmic linker associated protein 1                                | 1.14 | 0.01 |
| Q8WXW3 | progesterone immunomodulatory binding factor 1                         | 1.14 | 0.01 |
| Q9NZL3 | zinc finger protein 224                                                | 1.14 | 0.01 |
| P14616 | insulin receptor-related receptor                                      | 1.14 | 0.02 |
| Q96DY2 | IQ motif containing D                                                  | 1.14 | 0.02 |
| Q5UE93 | phosphoinositide-3-kinase, regulatory subunit 6                        | 1.14 | 0.02 |
| Q9ULE0 | WWC family member 3                                                    | 1.14 | 0.03 |
| O14980 | exportin 1 (CRM1 homolog, yeast)                                       | 1.14 | 0.04 |
| O00754 | mannosidase, alpha, class 2B, member 1                                 | 1.13 | 0.01 |
| Q8N4C8 | misshapen-like kinase 1 (zebrafish)                                    | 1.13 | 0.02 |
| Q9H3S7 | protein tyrosine phosphatase, non-receptor type 23                     | 1.13 | 0.03 |
| Q9BW92 | threonyl-tRNA synthetase 2, mitochondrial (putative)                   | 1.13 | 0.04 |
| Q6ZW49 | PAX interacting (with transcription-activation domain) protein 1       | 1.13 | 0.04 |
| Q16555 | dihydropyrimidinase-like 2                                             | 1.12 | 0    |
| Q96RY7 | intraflagellar transport 140 homolog (Chlamydomonas)                   | 1.12 | 0.01 |
| Q9C000 | NLR family, pyrin domain containing 1                                  | 1.12 | 0.01 |
| O75122 | cytoplasmic linker associated protein 2                                | 1.12 | 0.03 |
| P06576 | ATP synthase, H <sup>+</sup> transporting beta polypeptide             | 1.11 | 0    |
| O75417 | polymerase (DNA directed), theta                                       | 1.11 | 0    |
| Q14152 | eukaryotic translation initiation factor 3, subunit A                  | 1.11 | 0.02 |
| O60674 | Janus kinase 2 (a protein tyrosine kinase)                             | 1.11 | 0.03 |
| Q6PEY2 | tubulin, alpha 3e                                                      | 1.11 | 0.03 |
| Q9NUT2 | ATP-binding cassette, sub-family B (MDR/TAP), member 8                 | 1.11 | 0.04 |
| Q9UL54 | TAO kinase 2                                                           | 1.11 | 0.04 |

**Supplementary Table 3. Proteins upregulated within the CA1 region following ischemia and reperfusion.**

| Accession Number | Protein Name                                          | CA1 ischemia: CA1 Sham Ratio | p-value |
|------------------|-------------------------------------------------------|------------------------------|---------|
| Q07075           | aminopeptidase A                                      | 7.143                        | 0       |
| P31946           | 14-3-3 beta                                           | 5.556                        | 0       |
| Q8TDR2           | serine/threonine kinase 35                            | 4                            | 0.01    |
| P11413           | glucose-6-phosphate dehydrogenase                     | 2.273                        | 0.02    |
| Q8WXH2           | junctophilin 3                                        | 2.222                        | 0.04    |
| Q13835           | plakophilin 1                                         | 2.083                        | 0.03    |
| Q99665           | interleukin 12 receptor, beta 2                       | 2                            | 0       |
| Q96IZ5           | RNA binding motif protein 41                          | 1.923                        | 0       |
| P32926           | desmoglein 3 (pemphigus vulgaris antigen)             | 1.754                        | 0.01    |
| Q13017           | Rho GTPase activating protein 5                       | 1.754                        | 0       |
| P51841           | guanylate cyclase 2F, retinal                         | 1.724                        | 0       |
| Q8WXD9           | CASK interacting protein 1                            | 1.695                        | 0.04    |
| P16118           | 6-phosphofructo-2-kinase/fructose-2,6-biphosphatase 1 | 1.695                        | 0       |
| Q7Z4K8           | tripartite motif-containing 46                        | 1.639                        | 0       |
| P04264           | keratin 1 (epidermolytic hyperkeratosis)              | 1.562                        | 0       |
| Q9HAQ2           | kinesin family member 9                               | 1.515                        | 0       |
| O00159           | myosin IC                                             | 1.515                        | 0       |
| P78332           | RNA binding motif protein 6                           | 1.493                        | 0       |
| Q96JC1           | vacuolar protein sorting 39 homolog                   | 1.493                        | 0       |
| Q8TDC3           | BR serine/threonine kinase 1                          | 1.408                        | 0.04    |
| Q8N1G1           | REX1, RNA exonuclease 1 homolog                       | 1.37                         | 0.03    |
| P00367           | glutamate dehydrogenase 1                             | 1.37                         | 0       |
| Q6SZW1           | sterile alpha and TIR motif containing 1              | 1.37                         | 0       |
| Q9UBB9           | tuftelin interacting protein 11                       | 1.37                         | 0       |
| Q9UIF3           | tektin 2                                              | 1.351                        | 0.04    |
| Q6XZF7           | dynamamin binding protein                             | 1.351                        | 0.02    |
| Q9P202           | deafness, autosomal recessive 31                      | 1.333                        | 0.01    |
| P11498           | pyruvate carboxylase                                  | 1.333                        | 0       |
| Q9UJF2           | RAS protein activator like 2                          | 1.333                        | 0       |
| Q9NSC2           | sal-like 1                                            | 1.316                        | 0.02    |
| Q13885           | tubulin, beta 2A                                      | 1.316                        | 0       |
| P51788           | chloride channel 2                                    | 1.299                        | 0.04    |
| P04406           | glyceraldehyde-3-phosphate dehydrogenase              | 1.299                        | 0       |
| Q9BXR5           | toll-like receptor 10                                 | 1.282                        | 0.04    |
| Q9BYX4           | interferon induced with helicase C domain 1           | 1.282                        | 0.03    |
| Q8IWV2           | contactin 4                                           | 1.282                        | 0       |
| P19012           | keratin 15                                            | 1.282                        | 0       |
| Q8NEV4           | myosin IIIA                                           | 1.282                        | 0       |
| O75334           | protein tyrosine phosphatase, alpha 2                 | 1.266                        | 0.02    |
| Q9NY65           | tubulin, alpha 8                                      | 1.266                        | 0       |
| O94776           | metastasis associated 1 family, member 2              | 1.25                         | 0.04    |
| Q8IWY9           | congenital dyserythropoietic anemia, type I           | 1.25                         | 0.02    |
| Q15031           | leucyl-tRNA synthetase 2, mitochondrial               | 1.235                        | 0.02    |
| P48681           | nestin                                                | 1.235                        | 0.02    |

|        |                                                               |       |      |
|--------|---------------------------------------------------------------|-------|------|
| Q05639 | eukaryotic translation elongation factor 1 alpha 2            | 1.22  | 0.04 |
| P07101 | tyrosine hydroxylase                                          | 1.22  | 0.03 |
| Q86UW7 | Ca <sup>2+</sup> -dependent activator protein for secretion 2 | 1.22  | 0    |
| Q8N1F7 | nucleoporin 93kDa                                             | 1.22  | 0    |
| Q12884 | fibroblast activation protein, alpha                          | 1.205 | 0.01 |
| Q96NY9 | MUS81 endonuclease homolog                                    | 1.205 | 0.01 |
| Q9BZ72 | phosphatidylinositol transfer protein, membrane-associated 2  | 1.205 | 0    |
| P12236 | solute carrier family 25, member 6                            | 1.205 | 0    |
| Q13507 | transient receptor potential cation channel, subfamily C      | 1.19  | 0.04 |
| Q00341 | high density lipoprotein binding protein                      | 1.19  | 0.04 |
| Q9BY66 | jumonji, AT rich interactive domain 1D                        | 1.19  | 0.04 |
| Q29RF7 | PDS5, regulator of cohesion maintenance, homolog A            | 1.19  | 0.04 |
| O15164 | tripartite motif-containing 24                                | 1.19  | 0.03 |
| P20742 | pregnancy-zone protein                                        | 1.19  | 0.02 |
| O94983 | calmodulin binding transcription activator 2                  | 1.19  | 0.01 |
| Q9BYZ6 | Rho-related BTB domain containing 2                           | 1.19  | 0.01 |
| Q12860 | contactin 1                                                   | 1.19  | 0    |
| P13929 | enolase 3 (beta)                                              | 1.19  | 0    |
| O75093 | slit homolog 1                                                | 1.176 | 0.01 |
| P11142 | heat shock 70kDa protein 8                                    | 1.176 | 0    |
| Q13509 | tubulin, beta 3                                               | 1.176 | 0    |
| Q9BUF5 | tubulin, beta 6                                               | 1.176 | 0    |
| Q7KZF4 | staphylococcal nuclease and tudor domain containing 1         | 1.163 | 0.04 |
| Q96R06 | sperm associated antigen 5                                    | 1.163 | 0.03 |
| P42229 | signal transducer and activator of transcription 5A           | 1.163 | 0.02 |
| Q86UP2 | kinectin 1 (kinesin receptor)                                 | 1.163 | 0.01 |
| Q70J99 | unc-13 homolog D                                              | 1.163 | 0.01 |
| P08238 | heat shock protein 90kDa alpha (cytosolic), class B member 1  | 1.163 | 0    |
| P20594 | natriuretic peptide receptor B/guanylate cyclase B            | 1.163 | 0    |
| Q99797 | mitochondrial intermediate peptidase                          | 1.149 | 0.04 |
| Q96QU8 | exportin 6                                                    | 1.149 | 0.04 |
| O94851 | microtubule associated monooxygenase                          | 1.149 | 0.03 |
| P00558 | phosphoglycerate kinase 1                                     | 1.149 | 0.02 |
| P29590 | promyelocytic leukemia                                        | 1.149 | 0.02 |
| O60229 | kalirin, RhoGEF kinase                                        | 1.149 | 0.01 |
| Q9H0X9 | oxysterol binding protein-like 5                              | 1.149 | 0.01 |
| Q9P0K7 | retinoic acid induced 14                                      | 1.149 | 0    |
| Q9UL54 | TAO kinase 2                                                  | 1.149 | 0    |
| Q71U36 | tubulin, alpha 1a                                             | 1.149 | 0    |
| Q13748 | tubulin, alpha 3c                                             | 1.149 | 0    |
| Q6PKC3 | thioredoxin domain containing 11                              | 1.136 | 0.04 |
| Q92841 | DEAD (Asp-Glu-Ala-Asp) box polypeptide 17                     | 1.136 | 0.03 |
| Q9UBJ2 | ATP-binding cassette, sub-family D (ALD), member 2            | 1.136 | 0    |
| Q14999 | cullin 7                                                      | 1.136 | 0    |
| Q16555 | dihydropyrimidinase-like 2                                    | 1.136 | 0    |

|        |                                                        |       |      |
|--------|--------------------------------------------------------|-------|------|
| O60343 | TBC1 domain family, member 4                           | 1.136 | 0    |
| P08581 | met proto-oncogene (hepatocyte growth factor receptor) | 1.124 | 0.04 |
| O60503 | adenylate cyclase 9                                    | 1.124 | 0.04 |
| Q07890 | son of sevenless homolog 2                             | 1.124 | 0.03 |
| Q6P0Q8 | microtubule associated serine/threonine kinase 2       | 1.124 | 0.02 |
| P68371 | tubulin, beta 2C                                       | 1.124 | 0.02 |
| P61981 | tyrosine 3-monooxygenase/ gamma polypeptide            | 1.124 | 0.02 |
| O75122 | cytoplasmic linker associated protein 2                | 1.124 | 0    |
| P07437 | tubulin, beta                                          | 1.124 | 0    |
| O75146 | huntingtin interacting protein 1 related               | 1.111 | 0.04 |
| Q7Z4S6 | kinesin family member 21A                              | 1.111 | 0.04 |
| O43426 | synaptojanin 1                                         | 1.111 | 0.04 |
| P98171 | Rho GTPase activating protein 4                        | 1.111 | 0.03 |
| O00429 | dynamamin 1-like                                       | 1.111 | 0.03 |
| Q7RTR2 | NLR family, CARD domain containing 3                   | 1.111 | 0.03 |
| Q96MT8 | centrosomal protein 63kDa                              | 1.111 | 0.02 |
| Q8IYF3 | testis expressed 11                                    | 1.111 | 0.02 |
| Q6PEY2 | tubulin, alpha 3e                                      | 1.111 | 0.02 |
| P12814 | actinin, alpha 1                                       | 1.111 | 0.01 |
| Q96M83 | coiled-coil domain containing 7                        | 1.111 | 0.01 |
| Q66GS9 | centrosomal protein 135kDa                             | 1.111 | 0.01 |
| P56524 | histone deacetylase 4                                  | 1.111 | 0.01 |
| O43166 | signal-induced proliferation-associated 1 like 1       | 1.111 | 0.01 |
| Q9NR96 | toll-like receptor 9                                   | 1.111 | 0.01 |
| O43592 | exportin, tRNA                                         | 1.111 | 0.01 |

**Supplementary Table 4. Proteins upregulated within the CA3 region following ischemia and reperfusion.**

| Accession Number | Protein Name                                                  | CA3 ischemia: CA3 Sham Ratio | p-value |
|------------------|---------------------------------------------------------------|------------------------------|---------|
| P36776           | lon peptidase 1, mitochondrial                                | 16.667                       | 0       |
| O43182           | Rho GTPase activating protein 6                               | 14.286                       | 0       |
| Q14168           | membrane protein, palmitoylated 2                             | 14.286                       | 0       |
| O75366           | advillin                                                      | 3.613                        | 0.02    |
| Q8IZT8           | heparan sulfate (glucosamine) 3-O-sulfotransferase 5          | 2.941                        | 0       |
| Q15021           | non-SMC condensin I complex, subunit D2                       | 2.778                        | 0       |
| Q86UL8           | membrane associated guanylate kinase                          | 2.632                        | 0.03    |
| Q96NW4           | ankyrin repeat domain 27 (VPS9 domain)                        | 2.273                        | 0.04    |
| P17858           | phosphofructokinase, liver                                    | 1.887                        | 0       |
| O14746           | telomerase reverse transcriptase                              | 1.887                        | 0       |
| Q9NZM3           | intersectin 2                                                 | 1.852                        | 0       |
| P16435           | P450 (cytochrome) oxidoreductase                              | 1.754                        | 0       |
| O75473           | leucine-rich repeat-containing G protein-coupled receptor 5   | 1.695                        | 0       |
| O94776           | metastasis associated 1 family, member 2                      | 1.695                        | 0       |
| Q9UPT6           | mitogen-activated protein kinase 8 interacting protein 3      | 1.587                        | 0       |
| P54132           | Bloom syndrome                                                | 1.538                        | 0       |
| O60832           | dyskeratosis congenita 1, dyskerin                            | 1.538                        | 0       |
| P11413           | glucose-6-phosphate dehydrogenase                             | 1.515                        | 0       |
| P53355           | death-associated protein kinase 1                             | 1.493                        | 0       |
| Q12769           | nucleoporin 160kDa                                            | 1.493                        | 0       |
| O14841           | 5-oxoprolinase (ATP-hydrolysing)                              | 1.493                        | 0       |
| Q96NW7           | leucine rich repeat containing 7                              | 1.471                        | 0       |
| Q14164           | inhibitor of kappa light polypeptide gene enhancer in B-cells | 1.429                        | 0.01    |
| P22059           | oxysterol binding protein                                     | 1.429                        | 0       |
| Q96PV0           | synaptic Ras GTPase activating protein 1 homolog              | 1.429                        | 0       |
| Q9H3U1           | unc-45 homolog A                                              | 1.429                        | 0       |
| Q8TEW8           | par-3 partitioning defective 3 homolog B                      | 1.389                        | 0.01    |
| P54652           | heat shock 70kDa protein 2                                    | 1.389                        | 0       |
| P00338           | lactate dehydrogenase A                                       | 1.389                        | 0       |
| Q9Y6N6           | laminin, gamma 3                                              | 1.37                         | 0.01    |
| P07996           | thrombospondin 1                                              | 1.37                         | 0       |
| Q9H078           | ClpB caseinolytic peptidase B homolog                         | 1.351                        | 0.01    |
| Q9Y281           | cofilin 2                                                     | 1.351                        | 0       |
| P27348           | 14 3 3 theta                                                  | 1.351                        | 0       |
| Q9BPU6           | dihydropyrimidinase-like 5                                    | 1.333                        | 0.03    |
| P02538           | keratin 6A                                                    | 1.333                        | 0.02    |
| Q96G03           | phosphoglucomutase 2                                          | 1.333                        | 0.02    |
| Q9HCK4           | roundabout, axon guidance receptor, homolog 2                 | 1.316                        | 0.02    |
| P16234           | platelet-derived growth factor receptor, alpha polypeptide    | 1.316                        | 0.01    |
| P54756           | EPH receptor A5                                               | 1.299                        | 0.03    |
| Q9Y6U3           | scinderin                                                     | 1.299                        | 0.01    |
| P59046           | NLR family, pyrin domain containing 12                        | 1.282                        | 0.04    |
| Q7L8L6           | FAST kinase domains 5                                         | 1.266                        | 0.04    |
| Q96JM2           | zinc finger protein 462                                       | 1.266                        | 0.02    |
| Q96KQ7           | euchromatic histone-lysine N-methyltransferase 2              | 1.266                        | 0       |
| Q96CN9           | GRIP and coiled-coil domain containing 1                      | 1.266                        | 0       |
| Q9NPP4           | NLR family, CARD domain containing 4                          | 1.266                        | 0       |
| Q92574           | Hamartin                                                      | 1.266                        | 0       |
| P68363           | tubulin, alpha 1b                                             | 1.266                        | 0       |



|        |                                                              |       |      |
|--------|--------------------------------------------------------------|-------|------|
| Q9BQE3 | tubulin, alpha 1c                                            | 1.266 | 0    |
| P12236 | solute carrier family 25 , member 6                          | 1.25  | 0.03 |
| Q8NFM4 | adenylate cyclase 4                                          | 1.25  | 0.02 |
| Q92526 | chaperonin containing TCP1, subunit 6B (zeta 2)              | 1.25  | 0.01 |
| O00160 | myosin IF                                                    | 1.25  | 0    |
| P04350 | tubulin, beta 4                                              | 1.25  | 0    |
| Q96CW5 | tubulin, gamma complex associated protein 3                  | 1.25  | 0    |
| Q02241 | kinesin family member 23                                     | 1.235 | 0.04 |
| Q14160 | scribbled homolog                                            | 1.235 | 0.01 |
| P07900 | heat shock protein 90kDa alpha (cytosolic), class A member 1 | 1.235 | 0    |
| Q96LB3 | intraflagellar transport 74 homolog                          | 1.235 | 0    |
| Q8TEL6 | transient receptor potential cation channel, subfamily C     | 1.235 | 0    |
| Q71U36 | tubulin, alpha 1a                                            | 1.235 | 0    |
| Q15393 | splicing factor 3b, subunit 3, 130kDa                        | 1.22  | 0.04 |
| P56524 | histone deacetylase 4                                        | 1.22  | 0.01 |
| Q6XUX3 | receptor interacting protein kinase 5                        | 1.22  | 0.01 |
| Q9UQL6 | histone deacetylase 5                                        | 1.22  | 0    |
| Q14139 | ubiquitination factor E4A (UFD2 homolog)                     | 1.22  | 0    |
| O76041 | nebulette                                                    | 1.205 | 0.04 |
| Q7KZF4 | staphylococcal nuclease and tudor domain containing 1        | 1.205 | 0.04 |
| P55786 | aminopeptidase puromycin sensitive                           | 1.205 | 0.02 |
| O15164 | tripartite motif-containing 24                               | 1.205 | 0.02 |
| P08238 | heat shock protein 90kDa alpha (cytosolic), class B member 1 | 1.205 | 0.01 |
| O95819 | mitogen-activated protein kinase kinase kinase kinase 4      | 1.205 | 0.01 |
| P13497 | bone morphogenetic protein 1                                 | 1.205 | 0    |
| Q29RF7 | PDS5, regulator of cohesion maintenance, homolog A           | 1.19  | 0.04 |
| Q14587 | zinc finger protein 268                                      | 1.19  | 0.04 |
| Q9NRL2 | bromodomain adjacent to zinc finger domain, 1A               | 1.19  | 0.04 |
| Q92896 | golgi apparatus protein 1                                    | 1.19  | 0.02 |
| P06213 | insulin receptor                                             | 1.19  | 0.02 |
| P26232 | catenin (cadherin-associated protein), alpha 2               | 1.19  | 0.01 |
| Q16706 | mannosidase, alpha, class 2A, member 1                       | 1.19  | 0.01 |
| Q9UKW4 | vav 3 guanine nucleotide exchange factor                     | 1.19  | 0.01 |
| P60709 | actin, beta                                                  | 1.19  | 0    |
| P63261 | actin, gamma 1                                               | 1.19  | 0    |
| Q05707 | collagen, type XIV, alpha 1                                  | 1.19  | 0    |
| Q92841 | DEAD (Asp-Glu-Ala-Asp) box polypeptide 17                    | 1.19  | 0    |
| Q81YF3 | testis expressed 11                                          | 1.19  | 0    |
| Q9BVA1 | tubulin, beta 2B                                             | 1.19  | 0    |
| P62258 | tyrosine 3-monooxygenase, epsilon polypeptide                | 1.19  | 0    |
| O60391 | glutamate receptor, ionotropic, N-methyl-D-aspartate 3B      | 1.176 | 0.04 |
| Q12772 | sterol regulatory element binding transcription factor 2     | 1.176 | 0.02 |
| Q8NBJ4 | golgi membrane protein 1                                     | 1.176 | 0.01 |
| O15344 | midline 1 (Opitz/BBB syndrome)                               | 1.176 | 0.01 |
| Q86UP2 | kinectin 1 (kinesin receptor)                                | 1.176 | 0    |
| O75150 | ring finger protein 40                                       | 1.163 | 0.04 |
| Q8WVM7 | stromal antigen 1                                            | 1.163 | 0.03 |
| Q6PEY2 | tubulin, alpha 3e                                            | 1.163 | 0.02 |
| O94887 | FERM, RhoGEF and pleckstrin domain protein 2                 | 1.163 | 0.01 |
| Q9UJF2 | RAS protein activator like 2                                 | 1.163 | 0.01 |

|        |                                                                                    |       |      |
|--------|------------------------------------------------------------------------------------|-------|------|
| Q5VWQ8 | DAB2 interacting protein                                                           | 1.163 | 0    |
| O60264 | SWI/SNF related, actin dependent regulator of chromatin, alpha 5                   | 1.163 | 0    |
| Q13509 | tubulin, beta 3                                                                    | 1.163 | 0    |
| P50416 | carnitine palmitoyltransferase 1A                                                  | 1.149 | 0.04 |
| O95786 | DEAD (Asp-Glu-Ala-Asp) box polypeptide 58                                          | 1.149 | 0.02 |
| Q6BDS2 | UHRF1 (ICBP90) binding protein 1                                                   | 1.149 | 0.02 |
| Q96HN2 | S-adenosylhomocysteine hydrolase-like 2                                            | 1.149 | 0.01 |
| Q9ULK4 | mediator complex subunit 23                                                        | 1.149 | 0.01 |
| Q14525 | keratin 33B                                                                        | 1.149 | 0    |
| Q7RTR2 | NLR family, CARD domain containing 3                                               | 1.149 | 0    |
| Q9BUF5 | tubulin, beta 6                                                                    | 1.149 | 0    |
| P54198 | HIR histone cell cycle regulation defective homolog A                              | 1.136 | 0.04 |
| Q9Y2K2 | KIAA0999 protein                                                                   | 1.136 | 0.04 |
| Q9UNY4 | transcription termination factor, RNA polymerase II                                | 1.136 | 0.04 |
| Q9Y5Q8 | general transcription factor IIIC, polypeptide 5, 63kDa                            | 1.136 | 0.04 |
| Q9HBT7 | zinc finger protein 287                                                            | 1.136 | 0.03 |
| P09104 | enolase 2 (gamma, neuronal)                                                        | 1.136 | 0.02 |
| Q13029 | PR domain containing 2, with ZNF domain                                            | 1.136 | 0.02 |
| Q70CQ4 | ubiquitin specific peptidase 31                                                    | 1.136 | 0.02 |
| O15438 | ATP-binding cassette, sub-family C (CFTR/MRP), member 3                            | 1.136 | 0.01 |
| Q66GS9 | centrosomal protein 135kDa                                                         | 1.136 | 0.01 |
| Q05586 | glutamate receptor, ionotropic, N-methyl D-aspartate 1                             | 1.136 | 0.01 |
| P61981 | tyrosine 3-monooxygenase, gamma polypeptide                                        | 1.136 | 0    |
| Q9BX63 | BRCA1 interacting protein C-terminal helicase 1                                    | 1.124 | 0.04 |
| P54707 | ATPase, H <sup>+</sup> /K <sup>+</sup> transporting, nongastric, alpha polypeptide | 1.124 | 0.02 |
| Q9UJA3 | minichromosome maintenance complex component 8                                     | 1.124 | 0.02 |
| P29590 | promyelocytic leukemia                                                             | 1.124 | 0.02 |
| P12277 | creatine kinase, brain                                                             | 1.124 | 0.01 |
| P31150 | GDP dissociation inhibitor 1                                                       | 1.124 | 0.01 |
| P07437 | tubulin, beta                                                                      | 1.124 | 0    |
| Q13885 | tubulin, beta 2A                                                                   | 1.124 | 0    |
| P46020 | phosphorylase kinase, alpha 1                                                      | 1.111 | 0.04 |
| O94759 | transient receptor potential cation channel, subfamily M, member 2                 | 1.111 | 0.04 |
| Q9BQG0 | MYB binding protein (P160) 1a                                                      | 1.111 | 0.03 |
| Q12768 | KIAA0196                                                                           | 1.111 | 0.02 |
| P48681 | nestin                                                                             | 1.111 | 0.02 |
| Q99758 | ATP-binding cassette, sub-family A (ABC1), member 3                                | 1.111 | 0.01 |
| P60174 | triosephosphate isomerase 1                                                        | 1.111 | 0    |
| Q8N3P4 | vacuolar protein sorting 8 homolog                                                 | 1.111 | 0    |

**Supplementary Table 5. Proteins downregulated within the CA1 region after ischemia and reperfusion.**

| Accession Number | Protein Name                                                        | CA1 Sham: CA1 ischemia Ratio | p-value |
|------------------|---------------------------------------------------------------------|------------------------------|---------|
| P47989           | xanthine dehydrogenase                                              | 9.03                         | 0       |
| Q58EX7           | Puratrophin-1                                                       | 2.92                         | 0       |
| Q92526           | chaperonin containing TCP1, subunit 6B                              | 2.32                         | 0       |
| O75366           | advillin                                                            | 2.23                         | 0.01    |
| O76094           | signal recognition particle 72kDa                                   | 1.48                         | 0       |
| Q9NRL2           | bromodomain adjacent to zinc finger domain, 1A                      | 1.43                         | 0       |
| Q9Y613           | formin homology 2 domain containing 1                               | 1.42                         | 0       |
| Q9BQN1           | family with sequence similarity 83, member C                        | 1.4                          | 0.03    |
| Q9Y2J4           | angiomin like 2                                                     | 1.39                         | 0       |
| P17812           | CTP synthase                                                        | 1.36                         | 0       |
| P43243           | matrin 3                                                            | 1.35                         | 0.03    |
| O95025           | Semaphorin 3D                                                       | 1.35                         | 0       |
| Q9P253           | vacuolar protein sorting 18 homolog                                 | 1.34                         | 0       |
| P61158           | ARP3 actin-related protein 3 homolog                                | 1.32                         | 0       |
| O60462           | neuropilin 2                                                        | 1.32                         | 0       |
| Q12872           | splicing factor, arginine/serine-rich 8                             | 1.32                         | 0.04    |
| Q9UIG0           | bromodomain adjacent to zinc finger domain, 1B                      | 1.31                         | 0       |
| Q14527           | helicase-like transcription factor                                  | 1.3                          | 0.01    |
| O15439           | ATP-binding cassette, sub-family C (CFTR/MRP), member 4             | 1.28                         | 0       |
| P50213           | isocitrate dehydrogenase 3 (NAD+) alpha                             | 1.28                         | 0.04    |
| P34896           | serine hydroxymethyltransferase 1 (soluble)                         | 1.27                         | 0.02    |
| Q96ED9           | hook homolog 2                                                      | 1.26                         | 0.04    |
| P35908           | keratin 2                                                           | 1.26                         | 0.01    |
| P13637           | ATPase, Na+/K+ transporting, alpha 3 polypeptide                    | 1.25                         | 0       |
| Q16720           | ATPase, Ca++ transporting, plasma membrane 3                        | 1.23                         | 0       |
| Q9Y2T1           | axin 2 (conductin, axil)                                            | 1.23                         | 0.04    |
| Q9H2K2           | tankyrase, TRF1-interacting ankyrin-related ADP-ribose polymerase 2 | 1.23                         | 0.02    |
| Q9Y5H6           | protocadherin alpha 8                                               | 1.22                         | 0       |
| Q6P996           | pyridoxal-dependent decarboxylase domain containing 1               | 1.22                         | 0.02    |
| Q16825           | protein tyrosine phosphatase, non-receptor type 21                  | 1.22                         | 0       |
| P42658           | dipeptidyl-peptidase 6                                              | 1.21                         | 0       |
| P14923           | junction plakoglobin                                                | 1.21                         | 0.02    |
| P54277           | PMS1 postmeiotic segregation increased 1                            | 1.21                         | 0.03    |
| Q9UNM6           | proteasome (prosome, macropain) 26S subunit, non-ATPase, 13         | 1.21                         | 0       |
| Q5JTH9           | ribosomal RNA processing 12 homolog                                 | 1.21                         | 0       |
| Q92839           | hyaluronan synthase 1                                               | 1.2                          | 0.03    |
| Q8WTR7           | zinc finger protein 473                                             | 1.2                          | 0.01    |
| Q9UQ16           | dynamamin 3                                                         | 1.19                         | 0.01    |
| Q15051           | IQ motif containing B1                                              | 1.19                         | 0       |
| Q9H0B3           | KIAA1683                                                            | 1.19                         | 0       |
| Q96G03           | phosphoglucomutase 2                                                | 1.19                         | 0.02    |
| Q8TEL6           | transient receptor potential cation channel, subfamily C            | 1.19                         | 0.01    |
| Q9UQM7           | calcium/calmodulin-dependent protein kinase (CaM kinase) II alpha   | 1.17                         | 0       |
| P14868           | aspartyl-tRNA synthetase                                            | 1.17                         | 0       |
| Q01118           | sodium channel, voltage-gated, type VII, alpha                      | 1.17                         | 0.02    |
| Q12772           | sterol regulatory element binding transcription factor 2            | 1.17                         | 0.04    |

|        |                                                                               |      |      |
|--------|-------------------------------------------------------------------------------|------|------|
| P52735 | vav 2 guanine nucleotide exchange factor                                      | 1.17 | 0.04 |
| O95342 | ATP-binding cassette, sub-family B (MDR/TAP), member 11                       | 1.16 | 0.03 |
| P98196 | ATPase, class VI, type 11A                                                    | 1.16 | 0.01 |
| P06576 | ATP synthase, H <sup>+</sup> transporting, beta polypeptide                   | 1.16 | 0    |
| Q8TCU5 | glutamate receptor, ionotropic, N-methyl-D-aspartate 3A                       | 1.16 | 0.04 |
| Q08J23 | NOL1/NOP2/Sun domain family, member 2                                         | 1.16 | 0.04 |
| P05023 | ATPase, Na <sup>+</sup> /K <sup>+</sup> transporting, alpha 1 polypeptide     | 1.15 | 0    |
| O15083 | ELKS/RAB6-interacting/CAST family member 2                                    | 1.15 | 0.02 |
| Q99707 | 5-methyltetrahydrofolate-homocysteine methyltransferase                       | 1.15 | 0.04 |
| P18206 | vinculin                                                                      | 1.15 | 0.01 |
| Q08AN1 | zinc finger protein 616                                                       | 1.15 | 0.03 |
| P29322 | EPH receptor A8                                                               | 1.14 | 0.01 |
| P41594 | glutamate receptor, metabotropic 5                                            | 1.14 | 0.01 |
| Q6VAB6 | kinase suppressor of ras 2                                                    | 1.14 | 0.03 |
| P55160 | NCK-associated protein 1-like                                                 | 1.14 | 0.02 |
| O60312 | ATPase, class V, type 10A                                                     | 1.13 | 0.03 |
| P50993 | ATPase, Na <sup>+</sup> /K <sup>+</sup> transporting, alpha 2 (+) polypeptide | 1.13 | 0    |
| P23634 | ATPase, Ca <sup>++</sup> transporting, plasma membrane 4                      | 1.13 | 0.03 |
| O60231 | DEAH (Asp-Glu-Ala-His) box polypeptide 16                                     | 1.13 | 0.04 |
| Q5UE93 | phosphoinositide-3-kinase, regulatory subunit 6                               | 1.13 | 0.04 |
| Q6IQ26 | RAB6 interacting protein 1                                                    | 1.13 | 0.01 |
| Q9H2G2 | STE20-like kinase                                                             | 1.13 | 0    |
| P51523 | zinc finger protein 84                                                        | 1.13 | 0.04 |
| Q9P232 | contactin 3 (plasmacytoma associated)                                         | 1.12 | 0    |
| P11215 | integrin, alpha M (complement component 3 receptor 3 subunit)                 | 1.12 | 0.01 |
| Q14687 | KIAA0182                                                                      | 1.12 | 0.04 |
| Q8TCG1 | KIAA1524                                                                      | 1.12 | 0.03 |
| Q13201 | multimerin 1                                                                  | 1.12 | 0.03 |
| Q86SQ0 | pleckstrin homology-like domain, family B, member 2                           | 1.12 | 0.01 |
| Q8NDV3 | structural maintenance of chromosomes 1B                                      | 1.12 | 0    |
| Q13049 | tripartite motif-containing 32                                                | 1.12 | 0.04 |
| P63261 | actin, gamma 1                                                                | 1.11 | 0.02 |
| Q96F07 | cytoplasmic FMR1 interacting protein 2                                        | 1.11 | 0    |
| O00418 | eukaryotic elongation factor-2 kinase                                         | 1.11 | 0.04 |
| P36956 | sterol regulatory element binding transcription factor 1                      | 1.11 | 0.03 |

**Supplementary Table 6. Proteins downregulated within the CA3 region following ischemia and reperfusion**

| Accession Number | Protein Name                                                          | CA3 Sham: CA3 ischemia Ratio | p-value |
|------------------|-----------------------------------------------------------------------|------------------------------|---------|
| O95153           | benzodiazapine receptor (peripheral) associated protein 1             | 13.6                         | 0       |
| Q5T9A4           | ATPase family, AAA domain containing 3B                               | 5.26                         | 0.01    |
| Q8IWY9           | congenital dyserythropoietic anemia, type I                           | 3.63                         | 0       |
| P51788           | chloride channel 2                                                    | 2.51                         | 0.01    |
| Q96IZ5           | RNA binding motif protein 41                                          | 2.08                         | 0       |
| O43566           | regulator of G-protein signaling 14                                   | 1.88                         | 0       |
| Q8WTU0           | DDI1, DNA-damage inducible 1, homolog 1                               | 1.86                         | 0.03    |
| Q9P202           | deafness, autosomal recessive 31                                      | 1.72                         | 0       |
| O14678           | ATP-binding cassette, sub-family D (ALD), member 4                    | 1.68                         | 0.03    |
| Q16549           | proprotein convertase subtilisin/kexin type 7                         | 1.68                         | 0       |
| Q9UKV0           | histone deacetylase 9                                                 | 1.67                         | 0.02    |
| Q16720           | ATPase, Ca <sup>++</sup> transporting, plasma membrane 3              | 1.63                         | 0       |
| P49916           | ligase III, DNA, ATP-dependent                                        | 1.62                         | 0       |
| P78332           | RNA binding motif protein 6                                           | 1.6                          | 0.01    |
| P35228           | nitric oxide synthase 2A (inducible)                                  | 1.54                         | 0       |
| Q5VUB5           | chromosome 10 open reading frame 38                                   | 1.49                         | 0       |
| Q9P1Y5           | KIAA1543                                                              | 1.48                         | 0       |
| Q8WXD9           | CASK interacting protein 1                                            | 1.46                         | 0.01    |
| Q9H0K1           | SNF1-like kinase 2                                                    | 1.45                         | 0       |
| Q9UQM7           | calcium/calmodulin-dependent protein kinase (CaM kinase) II alpha     | 1.43                         | 0       |
| Q7Z7B0           | filamin A interacting protein 1                                       | 1.43                         | 0       |
| Q9UI12           | ATPase, H <sup>+</sup> transporting, lysosomal 50/57kDa, V1 subunit H | 1.42                         | 0.03    |
| Q9P2M7           | cingulin                                                              | 1.42                         | 0       |
| P14780           | matrix metalloproteinase 9                                            | 1.4                          | 0.04    |
| Q9H9E3           | component of oligomeric golgi complex 4                               | 1.4                          | 0.01    |
| O95757           | heat shock 70kDa protein 4-like                                       | 1.39                         | 0       |
| O15394           | neural cell adhesion molecule 2                                       | 1.38                         | 0.01    |
| O94874           | KIAA0776                                                              | 1.36                         | 0.02    |
| P19012           | keratin 15                                                            | 1.36                         | 0       |
| Q7Z3E2           | chromosome 10 open reading frame 118                                  | 1.35                         | 0.03    |
| Q96MW5           | component of oligomeric golgi complex 8                               | 1.35                         | 0.01    |
| Q9BQN1           | family with sequence similarity 83, member C                          | 1.35                         | 0.01    |
| Q5UE93           | phosphoinositide-3-kinase, regulatory subunit 6                       | 1.35                         | 0       |
| Q07075           | glutamyl aminopeptidase (aminopeptidase A)                            | 1.34                         | 0.04    |
| Q6PI48           | aspartyl-tRNA synthetase 2, mitochondrial                             | 1.32                         | 0       |
| P11216           | phosphorylase, glycogen; brain                                        | 1.32                         | 0       |
| O15455           | toll-like receptor 3                                                  | 1.32                         | 0       |
| Q9BST9           | rhotekin                                                              | 1.31                         | 0.04    |
| P22102           | phosphoribosylglycinamide formyltransferase                           | 1.31                         | 0       |
| P50991           | chaperonin containing TCP1, subunit 4 (delta)                         | 1.3                          | 0.02    |
| Q04695           | keratin 17                                                            | 1.3                          | 0.01    |
| P08581           | met proto-oncogene                                                    | 1.3                          | 0.01    |
| Q70J99           | unc-13 homolog D                                                      | 1.3                          | 0       |

|        |                                                             |      |      |
|--------|-------------------------------------------------------------|------|------|
| Q9Y2H9 | microtubule associated serine/threonine kinase 1            | 1.28 | 0.04 |
| O43295 | SLIT-ROBO Rho GTPase activating protein 3                   | 1.28 | 0    |
| Q07157 | tight junction protein 1 (zona occludens 1)                 | 1.28 | 0    |
| Q8TB22 | spermatogenesis associated 20                               | 1.27 | 0.02 |
| P60228 | eukaryotic translation initiation factor 3, subunit E       | 1.26 | 0.04 |
| P55201 | bromodomain and PHD finger containing, 1                    | 1.26 | 0.01 |
| Q13796 | shroom family member 2                                      | 1.26 | 0    |
| Q9Y6L7 | tolloid-like 2                                              | 1.26 | 0    |
| Q16531 | damage-specific DNA binding protein 1, 127kDa               | 1.25 | 0.04 |
| Q9NYA3 | golgi autoantigen, golgin subfamily a, 6                    | 1.25 | 0    |
| Q9BZZ5 | apoptosis inhibitor 5                                       | 1.23 | 0.04 |
| Q01814 | ATPase, Ca <sup>++</sup> transporting, plasma membrane 2    | 1.23 | 0.04 |
| Q9BZF3 | oxysterol binding protein-like 6                            | 1.23 | 0.03 |
| Q13972 | Ras protein-specific guanine nucleotide-releasing factor 1  | 1.23 | 0.02 |
| O00231 | proteasome (prosome, macropain) 26S subunit, non-ATPase, 11 | 1.22 | 0.01 |
| Q7Z460 | cytoplasmic linker associated protein 1                     | 1.22 | 0    |
| P21399 | aconitase 1, soluble                                        | 1.21 | 0.01 |
| O95782 | adaptor-related protein complex 2, alpha 1 subunit          | 1.21 | 0.01 |
| Q9H0B6 | kinesin light chain 2                                       | 1.21 | 0.01 |
| O75747 | phosphoinositide-3-kinase, class 2, gamma polypeptide       | 1.21 | 0.01 |
| P04259 | keratin 6B                                                  | 1.2  | 0.02 |
| Q9UL54 | TAO kinase 2                                                | 1.2  | 0.02 |
| Q96M96 | FYVE, RhoGEF and PH domain containing 4                     | 1.2  | 0.01 |
| O75083 | WD repeat domain 1                                          | 1.2  | 0    |
| P98171 | Rho GTPase activating protein 4                             | 1.19 | 0.04 |
| P43243 | matrin 3                                                    | 1.19 | 0.01 |
| Q8N4C8 | misshapen-like kinase 1                                     | 1.19 | 0    |
| Q16825 | protein tyrosine phosphatase, non-receptor type 21          | 1.19 | 0    |
| Q02880 | topoisomerase (DNA) II beta 180kDa                          | 1.17 | 0.03 |
| Q96NH3 | chromosome 6 open reading frame 170                         | 1.17 | 0.02 |
| Q9NTJ3 | structural maintenance of chromosomes 4                     | 1.17 | 0    |
| P12035 | keratin 3                                                   | 1.16 | 0.03 |
| Q92503 | SEC14-like 1                                                | 1.16 | 0.03 |
| O75094 | slit homolog 3                                              | 1.16 | 0.03 |
| Q92805 | golgi autoantigen, golgin subfamily a, 1                    | 1.16 | 0.02 |
| O60282 | kinesin family member 5C                                    | 1.16 | 0.02 |
| P52306 | RAP1, GTP-GDP dissociation stimulator 1                     | 1.16 | 0    |
| O14924 | regulator of G-protein signaling 12                         | 1.15 | 0.04 |
| Q8TEK3 | DOT1-like, histone H3 methyltransferase                     | 1.15 | 0.04 |
| Q14764 | major vault protein                                         | 1.15 | 0.04 |
| O95155 | ubiquitination factor E4B (UFD2 homolog)                    | 1.15 | 0.04 |
| Q9P2Y5 | UV radiation resistance associated gene                     | 1.15 | 0.03 |
| P23634 | ATPase, Ca <sup>++</sup> transporting, plasma membrane 4    | 1.15 | 0.02 |
| Q7Z478 | DEAH (Asp-Glu-Ala-His) box polypeptide 29                   | 1.15 | 0.02 |

|        |                                                                 |      |      |
|--------|-----------------------------------------------------------------|------|------|
| Q8TEQ6 | gem (nuclear organelle) associated protein 5                    | 1.15 | 0.02 |
| P46940 | IQ motif containing GTPase activating protein 1                 | 1.15 | 0.02 |
| P55160 | NCK-associated protein 1-like                                   | 1.15 | 0.02 |
| P33176 | kinesin family member 5B                                        | 1.15 | 0.01 |
| P82094 | TATA element modulatory factor 1                                | 1.15 | 0.01 |
| P09884 | polymerase (DNA directed), alpha 1                              | 1.15 | 0    |
| P30153 | protein phosphatase 2 (formerly 2A), regulatory subunit A       | 1.15 | 0    |
| Q9ULU8 | Ca <sup>2+</sup> -dependent secretion activator                 | 1.14 | 0.04 |
| Q9BYP7 | WNK lysine deficient protein kinase 3                           | 1.14 | 0.04 |
| Q9UQ16 | dynamitin 3                                                     | 1.14 | 0.02 |
| Q8IWB4 | family with sequence similarity 75, member A7                   | 1.14 | 0.02 |
| Q12965 | myosin IE                                                       | 1.14 | 0.02 |
| Q9UIG0 | bromodomain adjacent to zinc finger domain, 1B                  | 1.14 | 0.01 |
| O60674 | Janus kinase 2 (a protein tyrosine kinase)                      | 1.14 | 0.01 |
| O75417 | polymerase (DNA directed), theta                                | 1.14 | 0    |
| Q8N4X5 | actin filament associated protein 1-like 2                      | 1.13 | 0.04 |
| P28340 | polymerase (DNA directed), delta 1, catalytic subunit 125kDa    | 1.13 | 0.04 |
| P06737 | phosphorylase, glycogen; liver                                  | 1.13 | 0.03 |
| O14795 | unc-13 homolog B                                                | 1.13 | 0.02 |
| Q9UL18 | eukaryotic translation initiation factor 2C, 1                  | 1.13 | 0.01 |
| O75116 | Rho-associated, coiled-coil containing protein kinase 2         | 1.13 | 0.01 |
| Q9UKX5 | integrin, alpha 11                                              | 1.12 | 0.04 |
| P11137 | microtubule-associated protein 2                                | 1.12 | 0.04 |
| P55072 | valosin-containing protein                                      | 1.12 | 0.04 |
| O60423 | ATPase, class I, type 8B, member 3                              | 1.12 | 0.04 |
| Q8N122 | raptor                                                          | 1.12 | 0.04 |
| P08183 | ATP-binding cassette, sub-family B (MDR/TAP), member 1          | 1.12 | 0.03 |
| Q76N89 | HECT, C2 and WW domain containing E3 ubiquitin protein ligase 1 | 1.12 | 0.03 |
| Q9ULE0 | WWC family member 3                                             | 1.12 | 0.02 |
| O43432 | eukaryotic translation initiation factor 4 gamma, 3             | 1.11 | 0.04 |
| P21439 | ATP-binding cassette, sub-family B (MDR/TAP), member 4          | 1.11 | 0.04 |
| Q6DT37 | CDC42 binding protein kinase gamma (DMPK-like)                  | 1.11 | 0.03 |
| P19367 | hexokinase 1                                                    | 1.11 | 0.03 |
| P14616 | insulin receptor-related receptor                               | 1.11 | 0.03 |
| Q8WTW3 | component of oligomeric golgi complex 1                         | 1.11 | 0.02 |
| Q9BZF9 | uveal autoantigen with coiled-coil domains and ankyrin repeats  | 1.11 | 0.02 |
| Q8IWW7 | ubiquitin protein ligase E3 component n-recogin 1               | 1.11 | 0.02 |
| Q08AN1 | zinc finger protein 616                                         | 1.11 | 0.02 |
| O15061 | desmuslin                                                       | 1.11 | 0.01 |
| Q9P2H0 | KIAA1377                                                        | 1.11 | 0    |

**Supplementary Table 7. Proteins composing the pathway of Figure 1a**

| <b>Abbreviation</b>       | <b>Protein Name</b>                                             |
|---------------------------|-----------------------------------------------------------------|
| 4E-BP1                    | Eukaryotic translation initiation factor 4E-binding protein 1   |
| 14-3-3                    | 14-3-3                                                          |
| 14-3-3 beta               | 14-3-3 beta                                                     |
| 14-3-3 epsilon            | 14-3-3 epsilon                                                  |
| 14-3-3 gamma              | 14-3-3 gamma                                                    |
| 14-3-3 theta              | 14-3-3 theta                                                    |
| Akt-Calmodulin-Hsp90-Nos3 | Akt-Calmodulin-heat shock protein 90-nitric oxide synthase 3    |
| ASK1                      | Apoptosis signal-regulating kinase 1                            |
| AKT                       | Protein Kinase B                                                |
| BAD                       | Bcl2 antagonist of cell death                                   |
| Bcl-2                     | B-cell lymphoma 2                                               |
| Bcl-XL                    | B-cell lymphoma-extra large                                     |
| Calmodulin-Hsp90-Nos3     | Calmodulin-heat shock protein 90-nitric oxide synthase 3        |
| c-Raf                     | proto-oncogene c-RAF                                            |
| Cot                       | Cancer Osaka Thyroid oncogene                                   |
| eIF4E                     | Eukaryotic translation initiation factor 4E                     |
| eNOS                      | Endothelial nitric oxide synthase                               |
| ERK 1/2                   | Extracellular signal-regulated kinase 1/2                       |
| GRB2                      | Growth factor receptor-bound protein 2                          |
| Hamartin                  | Hamartin                                                        |
| Hsp90                     | heat shock protein 90kDa                                        |
| HSP90AA1                  | heat shock protein 90kDa alpha (cytosolic), class A member 1    |
| HSP90AB1                  | heat shock protein 90 alpha (cytosolic), class B member 1       |
| I $\kappa$ B              | Inhibitor of NF- $\kappa$ B                                     |
| IKK                       | Complex of two subunits, IKK $\alpha$ and IKK $\beta$           |
| JAK                       | Tyrosine protein kinase JAK3                                    |
| MEK 1/2                   | Mitogen-activated protein kinase kinase 1/2                     |
| mTORC1                    | Mammalian target of rapamycin                                   |
| NF- $\kappa$ B            | Nuclear factor kappa-light-chain-enhancer of activated B cells) |
| P70S6K                    | p70S6 kinase (p70S6K) is a serine/threonine kinase              |
| p27Kip1                   | A cyclin-dependent kinase inhibitor which binds to cyclinE/cdk2 |
| PDK1                      | An activator of Akt                                             |
| PI3K p85                  | Phosphatidylinositide 3-kinase p85 subunit                      |
| PI3K p110                 | Phosphoinositide 3-kinase [PI3K(p110 alpha)]                    |
| PIP2                      | Phosphatidylinositol 4,5-bisphosphate                           |
| PIP3                      | Phosphatidylinositol (3,4,5)-trisphosphate (PtdIns(3,4,5)P3)    |
| PP2A                      | Protein phosphatase 2A                                          |
| Ras                       | Oncogene                                                        |
| Rheb                      | Ras homolog enriched in brain                                   |
| RTK                       | Receptor tyrosine kinase                                        |
| SHC                       | SHC-transforming protein 1                                      |
| SHIP                      | SH2 domain-containing inositol 5'-phosphatase                   |
| SOS                       | Son of Sevenless                                                |
| Tuberin                   | Tuberin                                                         |



**Supplementary Table 8.** Proteins composing the network of Figure 1b

| <b>Abbreviation</b>     | <b>Protein Name</b>                                                         |
|-------------------------|-----------------------------------------------------------------------------|
| 14-3-3 beta             | 14-3-3 beta                                                                 |
| 14-3-3 epsilon          | 14-3-3 epsilon                                                              |
| 14-3-3 gamma            | 14-3-3 gamma                                                                |
| 14-3-3 theta            | 14-3-3 theta                                                                |
| ATP2B2                  | Plasma membrane calcium-transporting ATPase 2                               |
| ATP2B3                  | Plasma membrane calcium-transporting ATPase 3                               |
| ATP2B4                  | Plasma membrane calcium-transporting ATPase 4                               |
| Ca <sup>2+</sup> ATPase | Ca <sup>2+</sup> ATPase                                                     |
| Calmodulin              | Calmodulin                                                                  |
| CLASP1                  | Cytoplasmic linker associated protein 1                                     |
| ERK                     | Extracellular signal-regulated kinases                                      |
| Hamartin                | Hamartin                                                                    |
| KIAA1383                | Microtubule regulator 120 KDa; uncharacterized protein KIAA1383             |
| KIAA1543                | Calmodulin regulated spectrin-associated protein family, member 3 (CAMSAP3) |
| KIF5B                   | Kinesin heavy chain isoform 5B                                              |
| KIF5C                   | Kinesin heavy chain isoform 5C                                              |
| KIF23                   | Kinesin heavy chain isoform 23                                              |
| KLC2                    | Kinesin light chain 2                                                       |
| KTN1                    | Kinectin                                                                    |
| KRT33B                  | Keratin, type I cuticular Ha3-II                                            |
| MAP2                    | Microtubule-associated protein 2                                            |
| MVP                     | Major vault protein                                                         |
| PARD3B                  | Partitioning defective 3 homolog B                                          |
| PMCA                    | The plasma membrane Ca <sup>2+</sup> ATPase                                 |
| RASAL2                  | Ras GTPase-activating protein nGAP                                          |
| RASGRF1                 | Ras protein-specific guanine nucleotide-releasing factor 1                  |
| SHROOM2                 | Shroom family member 2                                                      |
| TRPM2                   | Transient receptor potential cation channel, subfamily M, member 2          |
| TUBA1A                  | Tubulin alpha-1A chain                                                      |
| TUBB2A                  | Tubulin beta-2A chain                                                       |
| TUBB3                   | Tubulin beta-3 chain                                                        |
| TUBB4                   | Tubulin beta-4 chain                                                        |
| Tubulin                 | Tubulin                                                                     |
| UNC13B                  | Protein unc-13 homolog B                                                    |
| VAV3                    | Guanine nucleotide exchange factor VAV3                                     |

**Supplementary Table 9. Differentially expressed proteins in CA1 compared to CA3 region after ischemia and reperfusion.**

|  |           |
|--|-----------|
|  | Decreased |
|  | Increased |
|  | No change |

| Protein Name                                                | CA1 S:<br>CA1 I | CA3 S:<br>CA3 I |
|-------------------------------------------------------------|-----------------|-----------------|
| Sodium potassium transporting ATPase subunit alpha 3        |                 |                 |
| Zinc finger protein 214                                     |                 |                 |
| Protein EMSY                                                |                 |                 |
| Catenin alpha 1                                             |                 |                 |
| Uncharacterized protein C15orf33                            |                 |                 |
| FYVE RhoGEF and PH domain containing protein 5              |                 |                 |
| RNA polymerase II associated protein 1                      |                 |                 |
| Actin like protein 3                                        |                 |                 |
| Chaperonin subunit 6a                                       |                 |                 |
| FH1 FH2 domain containing protein 1                         |                 |                 |
| Tubulin alpha 1A chain                                      |                 |                 |
| Actin cytoplasmic 1 Beta actin                              |                 |                 |
| ATP binding cassette sub family B member 8                  |                 |                 |
| Advillin p92                                                |                 |                 |
| Actin cytoplasmic 2 Gamma actin                             |                 |                 |
| Ubiquitin protein ligase E3B                                |                 |                 |
| RRP12 like protein                                          |                 |                 |
| Neurobeachin like                                           |                 |                 |
| Ran binding protein 17                                      |                 |                 |
| Caskin 1                                                    |                 |                 |
| RNA binding protein 41                                      |                 |                 |
| Alpha actinin 1                                             |                 |                 |
| Joubertin Abelson helper integration site 1 protein homolog |                 |                 |
| Serine threonine protein kinase TAO2                        |                 |                 |
| Zinc finger protein 780B                                    |                 |                 |
| Unc 13 homolog D                                            |                 |                 |
| Codanin 1                                                   |                 |                 |
| Centrosomal protein of 135 kDa                              |                 |                 |
| Tubulin beta chain Tubulin beta 5 chain                     |                 |                 |
| Vam6 Vps39 like protein                                     |                 |                 |

|                                                                                 |  |  |
|---------------------------------------------------------------------------------|--|--|
| Thioredoxin domain containing protein 11                                        |  |  |
| FERM RhoGEF and pleckstrin domain containing protein 1                          |  |  |
| Interferon induced helicase C domain containing protein 1                       |  |  |
| Kinesin like protein KIF21A                                                     |  |  |
| Myosin IIIA EC 2.7.11.1                                                         |  |  |
| Pyruvate carboxylase mitochondrial precursor                                    |  |  |
| Synaptojanin 1                                                                  |  |  |
| Tubulin alpha 8 chain                                                           |  |  |
| DNA cytosine 5 methyltransferase 1                                              |  |  |
| Bromodomain containing protein 1                                                |  |  |
| Zinc finger protein 228                                                         |  |  |
| Protein Jumonji                                                                 |  |  |
| FH1 FH2 domain containing protein 1                                             |  |  |
| Mannosyl oligosaccharide glucosidase                                            |  |  |
| Tyrosine protein kinase JAK3                                                    |  |  |
| PMS1 protein homolog 1                                                          |  |  |
| Dipeptidyl aminopeptidase like protein 6                                        |  |  |
| Coiled coil domain containing protein 22                                        |  |  |
| Centrosomal protein of 170 kDa                                                  |  |  |
| Succinate dehydrogenase ubiquinone flavoprotein subunit mitochondrial precursor |  |  |
| Ras GTPase activating protein 4                                                 |  |  |
| Tubulin beta 2A chain                                                           |  |  |
| Neuropilin 2 precursor                                                          |  |  |
| DNA directed RNA polymerase III subunit RPC1                                    |  |  |
| Alpha aminoadipic semialdehyde dehydrogenase                                    |  |  |
| Slit homolog 1 [precursor]                                                      |  |  |
| Vacuolar protein sorting associated protein 18 homolog                          |  |  |
| Dynactin subunit                                                                |  |  |
| Hook homolog 2                                                                  |  |  |
| ProSAAS                                                                         |  |  |
| Lysyl oxidase homolog 4 precursor                                               |  |  |

|                                                                       |        |        |
|-----------------------------------------------------------------------|--------|--------|
| Aspartate aminotransferase cytoplasmic                                | Yellow | Grey   |
| UNC45 homolog A                                                       | Grey   | Red    |
| Leucine rich repeat containing G protein coupled receptor 5 precursor | Grey   | Red    |
| Hamartin                                                              | Grey   | Red    |
| Zinc finger protein 658                                               | Grey   | Red    |
| Tubulin alpha 1C chain                                                | Grey   | Red    |
| 2 5 oligoadenylate synthetase 3                                       | Grey   | Red    |
| Intersectin 2                                                         | Grey   | Red    |
| Tubulin alpha 1B chain                                                | Grey   | Red    |
| GRIP and coiled coil domain containing protein                        | Grey   | Red    |
| Ecotropic viral integration site 5 protein homolog                    | Grey   | Red    |
| Protein glutamine gamma glutamyltransferase 6                         | Grey   | Red    |
| SET and MYND domain containing protein 4                              | Grey   | Red    |
| Oxysterol binding protein 1                                           | Grey   | Red    |
| 5 oxoprolinase                                                        | Grey   | Red    |
| 14 3 3 protein theta                                                  | Grey   | Red    |
| Intraflagellar transport 74 homolog                                   | Grey   | Red    |
| Kinesin like protein KIF24                                            | Grey   | Yellow |
| AFG3 like protein 2                                                   | Grey   | Yellow |
| Toll like receptor 3 precursor                                        | Grey   | Yellow |
| Trifunctional purine biosynthetic protein adenosine 3                 | Grey   | Yellow |
| SLIT ROBO Rho GTPase activating protein 3                             | Grey   | Yellow |
| Histone deacetylase 9                                                 | Grey   | Yellow |
| Formin like protein 1                                                 | Grey   | Yellow |
| Uncharacterized protein C10orf118                                     | Grey   | Yellow |
| Tryptophan 2 3 dioxygenase                                            | Grey   | Yellow |
| Probable ATP dependent RNA helicase                                   | Grey   | Yellow |
| Zinc finger protein 462                                               | Grey   | Yellow |
| UDP N acetylhexosamine pyrophosphorylase                              | Grey   | Yellow |
| Polypeptide N acetylgalactosaminyltransferase 5                       | Grey   | Yellow |

|                                                              |  |  |
|--------------------------------------------------------------|--|--|
| Zinc finger protein 234                                      |  |  |
| Progesterone induced blocking factor 1                       |  |  |
| Cingulin                                                     |  |  |
| Conserved oligomeric Golgi complex component 4               |  |  |
| Deleted in lung and esophageal cancer protein 1              |  |  |
| Golgin subfamily A member 6                                  |  |  |
| Twinkle protein mitochondrial precursor                      |  |  |
| Protein Shroom2                                              |  |  |
| Tolloid like protein 2 precursor                             |  |  |
| UHRF1-binding protein 1-like                                 |  |  |
| ATPase family AAA domain containing protein 3B               |  |  |
| CRSP complex subunit 6                                       |  |  |
| UHRF1-binding protein 1-like                                 |  |  |
| Filamin A interacting protein 1 FILIP                        |  |  |
| Dual specificity tyrosine phosphorylation regulated kinase 4 |  |  |
| Uncharacterized protein KIAA0562                             |  |  |
| Conserved oligomeric Golgi complex component 8               |  |  |
| DENN domain containing protein 2C                            |  |  |
| Chromosome associated protein G                              |  |  |
| T complex protein 1 subunit delta                            |  |  |
| MICAL like protein 2                                         |  |  |
| Peregrin                                                     |  |  |

Table showing a list of proteins shortlisted from the proteomic datasets using the criteria described in **Supplementary Fig. 7**. CA1 S is CA1 sham ischemia; CA1 I is CA1 ischemia; CA3 S is CA3 sham ischemia; CA3 I is CA3 ischemia. Red boxes show increase, yellow boxes indicate decrease, whereas, grey boxes represent no change in the expression levels between the groups.

## **Supplementary Results and Discussion**

### **Protein expression profile within the CA1 and CA3 regions under sham conditions**

Proteomic analysis of the cytoplasmic and membrane fractions from sham ischemic animals identified 1,066 proteins that were present in both the CA1 and CA3 regions of the hippocampus. From those, 137 (13%) had higher expression in the CA1 region compared to the CA3 region (**Supplementary Table 1**) and 139 (13%) were enriched within the CA3 relative to the CA1 region (**Supplementary Table 2**).

The datasets were analyzed ontologically using the panther classification system ([www.pantherdb.org](http://www.pantherdb.org)). For each region, the proteins with enhanced expression were grouped according to the molecular pathway or the biological process in which they participate. The number of proteins present in each molecular pathway or biological process was compared between the two regions. As a result, we identified pathways and processes that had a different number of enhanced proteins in the CA1 compared to the CA3 region.

Thirteen transporter proteins showed higher expression levels in the CA3 region, whereas in the CA1 there were 2 transporter proteins with enhanced expression relative to the CA3 region (**Supplementary Fig. 3**). Interestingly, one of these 13 transporters was the Ca<sup>2+</sup> transporting ATPase, which is involved in calcium homeostasis<sup>1, 2</sup>. Its expression was enhanced 38±14% in the CA3 region compared to the CA1 region ( $p<0.05$ ). This probably indicated an enhanced innate ability of CA3 cells to regulate Ca<sup>2+</sup> levels and limit excitotoxicity. Overall, in both groups a similar number of proteins was enhanced between the two regions.

## **The effect of ischemia and reperfusion on the proteome profile of the CA1 and CA3 regions**

In the CA1 region, 1,101 proteins were found to be present in both sham ischemic and ischemic rats, and 1,062 proteins were present the CA3 region of both sham ischemic and ischemic rats.

### **Profile of upregulated proteins following ischemia and reperfusion**

The profile of the proteins that were either upregulated or downregulated within the CA1 region following 10 min ischemia and 24 h of reperfusion was compared to the corresponding profile of the CA3 region using ontological analyses.

The number of proteins upregulated by ischemia and reperfusion was 114 (10%) in the CA1 (**Supplementary Table 3**) and 137 (13%) in the CA3 region (**Supplementary Table 4**). In the CA1 region, proteins with the highest upregulation included serine threonine protein kinase 35 (STK35;  $300\pm 34\%$ ;  $p<0.05$ ) and glucose-6-phosphate dehydrogenase (G6PD;  $127\pm 27\%$ ;  $p<0.05$ ) (**Supplementary Fig. 4a**).

In the CA3 region, proteins that were most highly upregulated as a consequence of ischemia were lon protease homolog (LONP1;  $1,566\pm 87\%$ ;  $p<0.05$ ), Rho GTPase-activating protein 6 (ARHGAP6;  $1,326\pm 67\%$ ;  $p<0.05$ ) and advillin ( $261\pm 48\%$ ;  $p<0.05$ ) (**Supplementary Fig. 4a**). LONP1 is a component of the proteolytic mitochondrial system which is inactivated by peroxynitrite<sup>3</sup>. It may be that CA3 cells are able to degrade abnormal proteins within the mitochondria more efficiently than the CA1 cells, preserving the vital integrity of mitochondria. ARHGAP6 is a Rho GTPase-activating protein which regulates cytoskeletal organization<sup>3</sup>. Finally, advillin is a calcium-regulated acting-binding protein that is implicated in neuronal cell morphogenesis<sup>4</sup>.

An ontological analysis was carried out using the panther classification to compare the profile of proteins upregulated by ischemia and reperfusion between the CA1 and the CA3 region (**Supplementary Fig. 4b**). In the CA3 region, 6 of the proteins upregulated were involved in apoptosis, with 4 being inhibitors of apoptosis, while 2 apoptosis inhibitors were found upregulated in the CA1 region. Additionally, Na<sup>+</sup>/K<sup>+</sup> ATPase was the only protein involved in homeostasis that was upregulated by ischemia in the CA3 region (12±3.4%, *p*<0.05). This protein regulates cellular homeostasis by restoring the resting potential<sup>5</sup>, and might constitute a mechanism which allows the CA3 region to prevent overexcitability and subsequent excitotoxicity following ischemia.

#### **Profile of downregulated proteins following ischemia and reperfusion**

Ischemia and reperfusion resulted in the significant downregulation of 81 (7%) proteins in the CA1 (**Supplementary Table 5**) and 127 (12%) proteins in the CA3 region (**Supplementary Table 6**). According to the ontological analysis, the biological processes encompassing the largest number of proteins downregulated selectively in the CA3 region were “protein modification” (29 proteins) and “signal transduction” proteins (21 proteins). In addition, the molecular pathways which had the largest number of downregulated proteins in the CA1 region were transporters (10 proteins) and hydrolases (9 proteins), whereas in the CA3 region they were nucleic acid binding proteins (17 proteins) and kinases (13 proteins) (**Supplementary Fig. 4c**).

#### **Protein network associated with the vulnerability of CA1 to ischemia**

To further identify targets for future studies we investigated the protein network most significantly associated with the events induced in the CA1 after ischemia (**Supplementary Fig. 5**). Examination of this protein network revealed important insights and complemented



previous studies explaining the vulnerability of CA1 cells to ischemia<sup>6, 7</sup>. In particular, many of the proteins comprising this network regulate ionic and calcium homeostasis dictating the outcome of excitotoxicity. ATP1A1, ATP1A2 and ATP1A3 are Na<sup>+</sup>/K<sup>+</sup> ATPases that help maintain the resting potential<sup>8</sup>. Interestingly, all three were found downregulated in the CA1 by ischemia probably contributing to hyperexcitability. It has been suggested that the reduction in the expression levels of the glutamate transporter, GLT-1 in astrocytes exacerbates excitotoxicity due to accumulation of synaptic glutamate as uptake is suppressed. Further evidence for excitotoxic injury was provided by the downregulation of ATP2B3, ATP2B4 and calcium/calmodulin-dependent kinase II (CaMKII). ATP2B3 and ATP2B4 are Ca<sup>2+</sup> ATPases that are essential to rectify changes in calcium levels resulting from excitotoxicity<sup>9</sup>. CaMKII inhibition enhances neuronal activity and increases sensitivity to excitotoxic glutamate signaling following ischemia<sup>10</sup>. Impairment of all these processes leads to the generation of free radicals, well established mediators of ischemic cell death, with superoxide mediating oxidative stress in the CA1 region by ischemia<sup>6</sup>. Protection from reactive oxygen species can be conferred by G6PD, which can act as a reducing agent<sup>11</sup>. We found GP6D to be one of the mostly upregulated proteins in the CA1 following ischemia possibly denoting that the vulnerable CA1 neurons have to cope with oxidative stress overload after ischemia and reperfusion. Ultimately, induction of apoptosis is the end-executor of cell death. Activation of caspases has been demonstrated as a detrimental step in the CA1 region<sup>12</sup>. Although we did not detect activated caspases in our proteomic analysis, primarily since we did not analyze the nuclear fraction, their activity after ischemia has been shown to cleave Ca<sup>2+</sup> ATPases resulting in calcium overload and cell death<sup>9</sup>. Overall, the biological importance of this network is in agreement with current knowledge explaining the vulnerability of CA1 neurons to ischemia.

## **Validation of the proteomic datasets by immunoblotting and comparison with current knowledge**

We carried out immunoblotting analysis to validate 14-3-3 theta expression levels in the cytoplasmic fraction (**Supplementary Fig. 6a**). In agreement with the proteomic data, 14-3-3 theta expression levels were unaffected following ischemia in the CA1 region (**Supplementary Fig. 6b**), but were significantly upregulated in the CA3 region (**Supplementary Fig. 6c**).

In addition, our proteomic datasets are in keeping with previously published proteomic studies. Gozal and colleagues<sup>13</sup> used 2D electrophoresis to characterize the CA1 and CA3 proteome from rats exposed to 6 h of intermittent hypoxia. Although the effect of hypoxia rather than ischemia was studied, a significant number of proteins exhibited an expression profile similar to the one shown in our study. For instance, beta tubulin, gamma enolase, and creatine kinase B were upregulated in the CA3 region, after either ischemia or intermittent hypoxia. Similarly, triose phosphate isomerase expression was found to be higher in the CA3 compared to the CA1 of control animals in both studies. The differences that exist between our study and the Gozal et al.<sup>13</sup> study may be attributed mainly to the difference in the insult (intermittent hypoxia versus ischemia) and in the analytical techniques used (2D electrophoresis versus LC-based label-free quantitation).

Results from studies showing the expressed genome of CA1 and CA3 cells after ischemia in rats<sup>14</sup> do not correlate closely with our results, with many of the entries identified in the genomic analyses not present in our data and vice versa. These differences could be a result of the experimental limitations of the proteomics as compared to the microarray studies. However, the current study shows similarities to genomic studies of human post-mortem tissue that compared the gene expression between the CA1 and the CA3<sup>15</sup>. For example, cytoskeletal proteins, such as actin, were found to be enriched in the CA3 region compared to

the CA1 in both studies. In agreement with our findings, microarray studies in mice<sup>16</sup> revealed overexpression of phosphofructokinase and Ca<sup>2+</sup> transporting ATPase in the CA3 region compared to the CA1 region.

### **Proteins associated with the CA3 resistance to ischemia**

To identify individual protein candidates associated with the ischemia-resistive properties of CA3 neurons, we hypothesized that in order for a protein to be functionally relevant to the differential response of the CA1 and the CA3 to ischemia, its expression profile should differ between the two regions after ischemia. We used the proteomic datasets and applied the selection criteria illustrated in **Supplementary Fig. 7** (see **Supplementary Table 9**). Critically, hamartin was selected using these criteria.

### **Methodology**

Employing a label-free quantification of the proteome expression levels using groups of 5 animals allowed the detection of small expression changes with significant confidence. This relied upon the ability of the system to derive individual quantitative data for a particular protein from all the detected peptides corresponding to this protein and integrating them to overall protein levels.

Although we tried to optimize our experimental design both for the proteomics experiments and the subsequent analysis, we acknowledge the associated limitations. Group sizes of 5 were a limitation imposed by the capacity of the label-free quantitation system and by the vast amount of data generated from 20 samples (5 CA1 and 5 CA3 fractions from sham ischemic and ischemic samples). In addition, in our analysis we did not consider any post-translational modifications since this would have increased the complexity of the analysis tremendously. Interpretation of proteomic data can often give rise to false positive

identification despite the use of rigorous filtering algorithms. However, the validation of our datasets by independent experiments and by comparison with published data provided additional confidence about the accuracy of our findings. In addition, proteomic analysis favors high copy number proteins, since protein abundance is a factor that determines the proteins identified<sup>17, 18</sup>. This may have resulted in the failure to detect proteins that were expressed at very low levels.

Crude microdissection of the CA1 and CA3 regions resulted to mixed cell populations present within these regions. Unfortunately, isolating single cell subset does not provide enough material to run proteomics experiments of this magnitude and requires tissue post-processing that can introduce artefactual changes in protein expression levels. One advantage of looking at all cell types is the creation of a more complete picture of the events of interest. Our study examined only the cytoplasmic and membrane fractions, and not the nuclear fraction, as we were unable to avoid significant contamination in our attempts to obtain a pure nuclear fraction.

Finally, all our data were generated from animals killed at a single time point following reperfusion. The reasoning is that after 24 h of reperfusion, although the CA1 cells are still viable, the ischemic cascade has already been activated, allowing the investigation of the effects of ischemia on morphologically intact cells.

### Supplementary Reference List

1. Garcia,M.L. & Strehler,E.E. Plasma membrane calcium ATPases as critical regulators of calcium homeostasis during neuronal cell function. *Front Biosci.* **4**, D869-D882 (1999).
2. Garcia,M.L., Usachev,Y.M., Thayer,S.A., Strehler,E.E., & Windebank,A.J. Plasma membrane calcium ATPase plays a role in reducing Ca(2+)-mediated cytotoxicity in PC12 cells. *J. Neurosci. Res.* **64**, 661-669 (2001).
3. Stanyer,L., Jorgensen,W., Hori,O., Clark,J.B., & Heales,S.J. Inactivation of brain mitochondrial Lon protease by peroxynitrite precedes electron transport chain dysfunction. *Neurochem. Int.* **53**, 95-101 (2008).
4. Silacci,P. *et al.* Gelsolin superfamily proteins: key regulators of cellular functions. *Cell Mol. Life Sci.* **61**, 2614-2623 (2004).
5. Teixeira,V.L., Katz,A.I., Pedemonte,C.H., & Bertorello,A.M. Isoform-specific regulation of Na<sup>+</sup>,K<sup>+</sup>-ATPase endocytosis and recruitment to the plasma membrane. *Ann. N. Y. Acad. Sci.* **986**, 587-594 (2003).
6. Wilde,G.J., Pringle,A.K., Wright,P., & Iannotti,F. Differential vulnerability of the CA1 and CA3 subfields of the hippocampus to superoxide and hydroxyl radicals in vitro. *J. Neurochem.* **69**, 883-886 (1997).
7. Ouyang,Y.B., Voloboueva,L.A., Xu,L.J., & Giffard,R.G. Selective dysfunction of hippocampal CA1 astrocytes contributes to delayed neuronal damage after transient forebrain ischemia. *J. Neurosci.* **27**, 4253-4260 (2007).
8. Carletti,J.V. *et al.* Folic Acid Prevents Behavioral Impairment and Na<sup>(+)</sup>,K<sup>(+)</sup>-ATPase Inhibition Caused by Neonatal Hypoxia-Ischemia. *Neurochem. Res.* **37**, 1624-1630 (2012).
9. Schwab,B.L. *et al.* Cleavage of plasma membrane calcium pumps by caspases: a link between apoptosis and necrosis. *Cell Death. Differ.* **9**, 818-831 (2002).
10. Ashpole,N.M. *et al.* Calcium/calmodulin-dependent protein kinase II (CaMKII) inhibition induces neurotoxicity via dysregulation of glutamate/calcium signaling and hyperexcitability. *J. Biol. Chem.* **287**, 8495-8506 (2012).
11. Garcia-Nogales,P., Almeida,A., & Bolanos,J.P. Peroxynitrite protects neurons against nitric oxide-mediated apoptosis. A key role for glucose-6-phosphate dehydrogenase activity in neuroprotection. *J. Biol. Chem.* **278**, 864-874 (2003).
12. Chen,J. *et al.* Induction of caspase-3-like protease may mediate delayed neuronal death in the hippocampus after transient cerebral ischemia. *J. Neurosci.* **18**, 4914-4928 (1998).
13. Gozal,E. *et al.* Proteomic analysis of CA1 and CA3 regions of rat hippocampus and differential susceptibility to intermittent hypoxia. *J. Neurochem.* **83**, 331-345 (2002).

14. Newrzella,D. *et al.* The functional genome of CA1 and CA3 neurons under native conditions and in response to ischemia. *BMC. Genomics* **8**, 370 (2007).
15. Ginsberg,S.D. & Che,S. Expression profile analysis within the human hippocampus: comparison of CA1 and CA3 pyramidal neurons. *J. Comp Neurol.* **487**, 107-118 (2005).
16. Lein,E.S., Zhao,X., & Gage,F.H. Defining a molecular atlas of the hippocampus using DNA microarrays and high-throughput in situ hybridization. *J. Neurosci.* **24**, 3879-3889 (2004).
17. Lubec,G., Krapfenbauer,K., & Fountoulakis,M. Proteomics in brain research: potentials and limitations. *Prog. Neurobiol.* **69**, 193-211 (2003).
18. Garbis,S., Lubec,G., & Fountoulakis,M. Limitations of current proteomics technologies. *J. Chromatogr. A* **1077**, 1-18 (2005).
